1 **Unexpected versatility in the metabolism and ecophysiology of globally relevant nitrite-**  
2 **oxidizing *Nitrotoga* bacteria**

3  
4 Andrew M. Boddicker<sup>1</sup> and Annika C. Mosier<sup>1†</sup>

5  
6 <sup>1</sup>Department of Integrative Biology, University of Colorado Denver, Campus Box 171, Denver,  
7 CO, USA

8  
9 †To whom correspondence should be addressed. E-mail: [annika.mosier@ucdenver.edu](mailto:annika.mosier@ucdenver.edu)

10

11 Keywords: *Nitrotoga*, nitrite-oxidizing bacteria, freshwater nitrification

12

13 Running title: *Nitrotoga* are prevalent and versatile nitrite oxidizers

14

15 Competing Interests: The authors declare no competing interests. Portions of this manuscript  
16 were previously published as a part of University of Colorado Denver Master's thesis submission  
17 (AB, 2017). Funding was provided by the University of Colorado, Denver and the City and  
18 County of Denver.

19

20 **ABSTRACT**

21 Nitrite-oxidizing bacteria (NOB) play a critical role in the mitigation of nitrogen pollution from  
22 freshwater systems by metabolizing nitrite to nitrate, which is removed via assimilation,  
23 denitrification, or anammox. Recent studies revealed that NOB are phylogenetically and  
24 metabolically diverse, yet most of our knowledge of NOB comes from only a few cultured  
25 representatives. Using enrichment methods and genomic sequencing, we identified four novel  
26 *Candidatus Nitrotoga* NOB species from freshwater sediments and water column samples in  
27 Colorado, USA. Genome assembly revealed highly conserved 16S rRNA gene sequences, but a  
28 surprisingly broad metabolic potential including genes for nitrogen, sulfur, hydrogen, and  
29 organic carbon metabolism. Genomic predictions suggest that *Nitrotoga* can metabolize in low  
30 oxygen or anaerobic conditions, which may support a previously unrecognized environmental  
31 niche. An array of antibiotic and metal resistance genes likely allows *Nitrotoga* to withstand  
32 environmental pressures in impacted systems. Phylogenetic analyses reveal a deeply divergent  
33 nitrite oxidoreductase alpha subunit (NxrA) not represented in any other NOB, suggesting a  
34 novel evolutionary trajectory for *Nitrotoga*. *Nitrotoga*-like 16S rRNA gene sequences were  
35 prevalent in globally distributed environments. This work considerably expands our knowledge  
36 of the *Nitrotoga* genus and improves our understanding of their role in the global nitrogen cycle.

37



## 38 INTRODUCTION

39 Increasing anthropogenic sources of nitrogen have led to environmental risks including  
40 eutrophication, increased greenhouse gas emissions, and acidification. Nitrite-oxidizing bacteria  
41 (NOB) play a critical role in mitigating the harmful effects of nitrogen pollution by linking  
42 nitrogen sources to nitrogen removal. Specifically, nitrite pools from natural (e.g., ammonia  
43 oxidation) or anthropogenic (e.g., fertilizer) sources are converted into nitrate, which is  
44 assimilated or removed as inert nitrogen gas via denitrification or anammox pathways. Thus,  
45 understanding the diversity, metabolism, and environmental limits of NOB is important for  
46 controlling and managing elevated nitrogen in contaminated ecosystems.

47 Despite the environmental relevance of NOB, the group is understudied in part due to  
48 slow growth, taking as long as 12 years for isolation (Lebedeva, *et al.* 2008). Assiduous  
49 cultivation efforts (Alawi *et al.*, 2007; Daims *et al.*, 2015; Sorokin *et al.*, 2012; van Kessel *et al.*,  
50 2015; Watson *et al.*, 1986; Watson & Waterbury, 1971), as well as single-cell (Ngugi *et al.*,  
51 2015) and metagenomic (Pinto *et al.*, 2015) sequencing studies are beginning to illuminate the  
52 diversity of nitrite oxidizers. The known NOB belong to four phyla and seven different genera,  
53 three of which were discovered within the last decade: *Candidatus Nitrotoga*, *Nitrolancea*, and  
54 *Candidatus Nitromaritima* (Alawi *et al.*, 2007; Ngugi *et al.*, 2015; Sorokin *et al.*, 2012). NOB are  
55 physiologically versatile, utilizing nitrite oxidation, complete ammonia oxidation (comammox  
56 within the *Nitrospira*) (Daims *et al.*, 2015; van Kessel *et al.*, 2015), as well as organic carbon,  
57 hydrogen, and sulfur metabolisms to drive growth (Koch *et al.*, 2016; Daims *et al.*, 2016; Füssel  
58 *et al.*, 2017).

59 *Nitrotoga* is an understudied genus of NOB that may play a critical role in nitrogen  
60 removal in engineered and natural environments (Lücker *et al.*, 2015). Recent 16S rRNA-based  
61 molecular surveys have identified *Nitrotoga*-like sequences in a surprisingly wide range of  
62 habitats, including: glacial soils (Pradhan *et al.*, 2010; Sattin *et al.*, 2009; Schmidt *et al.*, 2009;  
63 Srinivas *et al.*, 2011), an underground cave (Chen *et al.*, 2009), a freshwater seep (Roden *et al.*,  
64 2012), drinking water (Kinnunen *et al.*, 2017; White, DeBry, & Lytle, 2012), a subglacial  
65 Antarctic lake (Christner *et al.*, 2014), Yellow Sea seawater (Na *et al.*, 2011), salt marsh  
66 sediments (Martiny *et al.*, 2011), rivers (Fan *et al.*, 2016; Li *et al.*, 2011), and various wastewater  
67 treatment plants (WWTPs) or sequence batch reactors (Bereschenko *et al.*, 2010; Figdore,  
68 Stensel, & Winkler, 2017; Karkman *et al.*, 2011; Lücker *et al.*, 2015; Saunders *et al.*, 2015;  
69 Yang, Chen, & Li, 2016; Ziegler *et al.*, 2016). The relative abundance of *Nitrotoga*-like  
70 sequences in several WWTPs and a subglacial lake were as high as 2-13% of the total bacterial  
71 community, and were occasionally the only observed NOB (Christner *et al.*, 2014; Lücker *et al.*,  
72 2015; Saunders *et al.*, 2015). The distribution and relative abundance of *Nitrotoga*-like  
73 sequences suggest these organisms likely play a critical nitrogen cycling role in diverse  
74 environments; however, few studies have attempted to characterize their diversity or physiology.

75 Only four *Nitrotoga* cultures have been reported to date, with no confirmed isolates and  
76 no genome sequences are available within the genus. *Candidatus Nitrotoga arctica* was enriched  
77 from permafrost (Alawi *et al.*, 2007); *Candidatus Nitrotoga* sp. HAM-1 from activated sludge  
78 (Alawi *et al.*, 2009); *Candidatus Nitrotoga* sp. HW29 from an aquaculture system (Hüpeden *et al.*,  
79 2016); and *Candidatus Nitrotoga* sp. AM1 from coastal sand (Ishii *et al.*, 2017). All  
80 *Nitrotoga* were enriched at low temperatures (4-17°C), however temperature optima were  
81 slightly higher (13-22°C) (Alawi *et al.*, 2007, 2009; Hüpeden *et al.*, 2016; Ishii *et al.*, 2017). *Ca.*  
82 *Nitrotoga arctica* has an intermediate nitrite affinity and is adapted to low nitrite concentrations  
83 (0.3 mM) compared to other NOB (Nowka *et al.*, 2015; Kits *et al.*, 2017).

84 Here, we describe near-complete draft genome sequences of four novel *Nitrotoga* species  
85 enriched from river water column and sediment samples. Each organism contained genomic  
86 capabilities for diverse metabolisms, which could support their growth in a wide range of  
87 habitats. This study represents the first reported cultivation of *Nitrotoga* from natural, freshwater  
88 systems and the first genome profiling from within the genus. These findings extend our  
89 understanding of freshwater nitrite oxidation and form the basis for further experimental work  
90 aimed at testing genomic predictions in culture and in the environment.

91

## 92 **METHODS**

### 93 **Culture inoculation and growth**

94 Two surface sediment samples were collected from the urban-impacted Cherry Creek in  
95 downtown Denver, CO (samples MKT and LAW). Two water column samples were collected  
96 from two agriculturally-impacted rivers near Greeley, CO (about 100 km North of Denver, CO)  
97 (samples CP45 from the Cache la Poudre River and SPKER from the South Platte River).  
98 Sediment and water column samples were inoculated into Freshwater Nitrite Oxidizer Medium  
99 (FNOM) with 0.3 mM nitrite and incubated at room temperature in the dark (Supplemental  
100 Note). Enrichment cultures were transferred to new media approximately every two weeks.  
101 Enrichment was enhanced by serial dilution, rapid transfers at the beginning of nitrite  
102 consumption, and low volume transfers (as low as 0.1% inoculum vol./vol.). Nitrite consumption  
103 was regularly monitored in the cultures using a Griess nitrite color reagent (Griess-Romijn van  
104 Eck, 1966). Nitrite oxidation rates were determined in triplicate for each enrichment culture  
105 (Supplemental Note).

106

### 107 **DNA extraction and sequencing**

108 DNA was extracted from each culture at mid- to late-phase of exponential nitrite  
109 oxidation (Supplemental Note). Extracted DNA was sheared using a Covaris S220 (Covaris,  
110 Woburn, MA) and libraries were prepped with an insert size of 400 bp using an Ovation  
111 Ultralow System V2 (No. 0344) kit (Nugen, San Carlos, CA) by the University of Colorado  
112 Anschutz Medical Campus Genomics Core. DNA was sequenced on an Illumina HiSeq 2500  
113 using V4 chemistry (Illumina, San Diego, CA) with 125 bp paired end reads.

114

### 115 **Metagenome and *Nitrotoga* genome assembly and annotation**

116 Metagenomes from each enrichment culture were assembled with quality filtered and  
117 trimmed reads using MEGAHIT (Li *et al.*, 2014) and contigs were binned using MetaBAT  
118 (Kang *et al.*, 2015). *Nitrotoga* genomes were assembled iteratively with SPAdes v3.9.0  
119 (Bankevich *et al.*, 2012) (Supplemental Note). Genome bin completeness and contamination  
120 estimates were calculated using the CheckM v1.0.11 lineage workflow (Parks *et al.*, 2015)  
121 (Supplemental Note).

122

123 Final assemblies were filtered to remove contigs <2 kb, all of which had very low and  
124 uneven coverage estimates. The *Nitrotoga* genomes were aligned and contigs reordered with  
125 progressiveMauve (Darling *et al.*, 2010), using the *Nitrotoga* species from the MKT culture as a  
126 reference due to its long contig length and simple assembly graph. Genomes were submitted to  
127 the DOE-JGI Microbial Genome Annotation Pipeline (MGAP) (Huntemann *et al.*, 2015) for  
128 final contig trimming of ambiguous and low-complexity sequences. Gene annotations were  
129 evaluated based on results from MGAP including COG, KEGG, Pfam, and TIGRfam  
130 assignments, InterPro Scan, IMG term assignments, and final protein product assignments

130 (Huntemann *et al.*, 2015 and references within), as well as a BLASTP search of all predicted  
131 CDS against the nr database and annotation with KASS (Moriya *et al.*, 2007). RNAs were  
132 detected via MGAP with CRT, pilercr, tRNAscan, hmmsearch, BLASTN, and cmsearch  
133 (Huntemann *et al.*, 2015 and references within).

134

### 135 ***Nitrotoga* comparative genomics**

136 The Anvi'o pangenome pipeline (Eren *et al.*, 2015) was used to cluster (mcl=10) coding  
137 sequences from each *Nitrotoga* genome in order to establish a 'core genome' of genes shared by  
138 all four *Nitrotoga* spp., and genes unique to each genome or shared by two or three *Nitrotoga*  
139 spp. Average nucleotide identity (ANI) and average amino acid identity (AAI) were calculated  
140 using the online enveomics tools (Rodriguez-R and Konstantinidis, 2016).

141

### 142 ***Nitrotoga* phylogenetic analyses**

143 Near full-length *Nitrotoga*-like 16S rRNA gene sequences in the NCBI nt database were  
144 identified by a BLASTN search. Sequences were retained if they were  $\geq 1300$  bp in length and  
145 had  $\geq 95\%$  identity to any of the cultivated *Nitrotoga* 16S rRNA gene sequences from this study.  
146 16S rRNA gene sequences from the BLASTN search were aligned with MAFFT (Katoh and  
147 Standley, 2013) and manually trimmed. A maximum likelihood tree was generated using  
148 RAxML (version 8.2.9) with 100 rapid bootstraps and the GTRGAMMA model of nucleotide  
149 substitution. A single monophyletic clade was extracted from the resulting phylogenetic tree,  
150 which included all known *Nitrotoga* 16S rRNA gene sequences. Neighboring clades included  
151 members of different genera. Selected outgroup sequences were added to the extracted sequences  
152 and then were realigned and trimmed, and a maximum likelihood tree was generated with 1000  
153 rapid bootstraps.

154 Amino acid sequences ( $\geq 833$  amino acids in length) of Type II DMSO reductase family  
155 enzymes were compiled based on previous research (Lücker *et al.*, 2010, 2013; Ngugi *et al.*,  
156 2015) and a BLASTP search of the NCBI nr database. Sequences were aligned using MAFFT  
157 (Katoh and Standley, 2013) and manually trimmed. A maximum likelihood tree was built using  
158 RAxML with 1000 rapid bootstraps and the LG likelihood model of amino acid substitution  
159 (based on PROTGAMMAAUTO selection). All trees were visualized and annotated in iTOL  
160 (Letunic and Bork, 2016).

161

### 162 **Distribution of *Nitrotoga*-like 16S rRNA gene sequences in the environment**

163 Full-length 16S rRNA gene sequences from each *Nitrotoga* culture were submitted to the  
164 IMNGS online server (Lagkouvardos *et al.*, 2016) for searches against all 183,153 16S rRNA  
165 gene amplicon runs from the NCBI Sequence Read Archive (SRA) (March 2018 release). A  
166 minimum identity threshold of 97% was chosen to represent *Nitrotoga*-like sequences at the  
167 genus level due to phylogenetic resolution of 16S rRNA gene sequences (see results). Samples  
168 were removed if they did not have at least 100 reads associated with *Nitrotoga*-like operational  
169 taxonomic units (OTUs). Data was summarized by SRA annotated environment categories. In  
170 some cases, SRA annotated categories were merged together: "aquatic", "freshwater", and  
171 "pond" were merged into "freshwater"; "freshwater\_sediment" and "sediment" were merged into  
172 "sediment"; "biofilm" and "microbial\_mat" were merged into "biofilm"; "soil", "terrestrial", and  
173 "peat" were combined into "soil"; and "plant", "rhizosphere", and "root" were merged into  
174 "plant-associated".

175

## 176 **Relative abundance of *Nitrotoga* in creek sediments and water column**

177 Water column and sediment samples were collected from 18 sites along Bear Creek, 18  
178 sites along Cherry Creek, and four sites along the South Platte River at the confluences of Bear  
179 Creek and Cherry Creek in Denver, Colorado, USA in Fall 2016 (Supplemental Note). DNA  
180 extracts were sent to the University of Illinois Roy J. Carver Biotechnology Center, Urbana,  
181 Illinois for total 16S rRNA amplicon sequencing using the 515F-Y and 926R primers (Parada *et*  
182 *al.*, 2015; Quince *et al.*, 2011). Libraries were prepared with the Fluidigm 48.48 Access Array  
183 IFC platform (Fluidigm Corporation, South San Francisco, CA) as previously described  
184 (Ramanathan *et al.*, 2017), and sequenced on an Illumina HiSeq with Rapid 250 bp paired-end  
185 reads (Illumina, San Diego, CA). Filtered reads were clustered into OTUs at 97% sequence  
186 identity and taxonomy was assigned with a BLASTN search against the SILVA 16S rRNA gene  
187 database (release 128) (Quast *et al.*, 2013).

188

## 189 **RESULTS AND DISCUSSION**

### 190 **Enrichment and nitrite oxidation**

191 The four nitrite-oxidizing cultures were enriched for 17 (CP45 and SPKER) or 20 (LAW  
192 and MKT) months via serial dilution and rapid transfer. Nitrite oxidation rates (calculated across  
193 three measurements during logarithmic nitrite oxidation) averaged  $135.6 \pm 21.5 \mu\text{M NO}_2^-/\text{day}$   
194 (Figure 1), which was similar to previously reported data for *Ca. Nitrotoga arctica* (Nowka *et al.*,  
195 2015). 16S rRNA gene sequence analyses and PCR with NOB specific primers revealed that  
196 each culture contained only one NOB related to the *Candidatus Nitrotoga* genus  
197 (Betaproteobacteria class; Nitrosomonadales order; Gallionellaceae family).

198 We propose the following names for the enriched *Nitrotoga* species: *Candidatus*  
199 *Nitrotoga mira* MKT (n, nominative adjective, *mirus*, surprising) for the species enriched from  
200 Cherry Creek sediment and the unexpected enrichment of freshwater *Nitrotoga*; *Candidatus*  
201 *Nitrotoga auraria* LAW (f, nominative, noun, *aurarius*, of gold) for the species enriched from  
202 Cherry Creek sediment located near the historic Auraria settlement; *Candidatus Nitrotoga amnis*  
203 CP45 (m, genitive, noun, *amnis*, river) for the species enriched from Cache la Poudre River  
204 water; and *Candidatus Nitrotoga coloradensis* SPKER (f, adjective, Colorado, state central US)  
205 for the species enriched from water in the South Platte River, which flows through northeastern  
206 Colorado. Strain names represent sampling sites specific to each culture.

207

### 208 **Metagenome assembly and binning**

209 Metagenomic sequencing of the enrichment cultures showed that each culture contained  
210 8-32 genome bins (CP45: 8; MKT: 14; LAW: 23; SPKER: 32), likely corresponding to a similar  
211 number of species in each enrichment culture. Attempted co-assemblies of all four metagenomes  
212 were not successful as each enrichment culture had different species compositions. Each  
213 metagenome assembly contained only one predicted NOB related to *Nitrotoga* spp, along with  
214 other Proteobacteria including *Pseudomonas* spp, *Methylobacter* spp, and several members of  
215 the Comamonadaceae family (based on EMIRGE-assembled 16S rRNA genes (Miller *et al.*,  
216 2011) and the CheckM lineage workflow). One genome bin from the SPKER metagenome likely  
217 belonged to a protozoan in the Neobodonida order that may prey on bacteria in culture.

218



## 219 ***Nitrotoga* genome assembly**

220 The *Nitrotoga* genome bins from each culture had very high average coverage (201-  
221 398X). *Nitrotoga* genome bins were predicted to be 99.8% complete with  $\leq 0.3\%$  contamination  
222 by CheckM (after manual assignment of some marker genes; Supplemental Note; Supplementary  
223 Table S1). These high-quality draft sequences are the first known *Nitrotoga* genomes. The  
224 closest relatives with genome sequences were *Sideroxydans lithotrophicus* ES-1, *Gallionella*  
225 *capsiferriformans* ES-2, and *Ca. Gallionella acididurans* ShG14-8.

226 *Nitrotoga* genomes ranged in size from 2.707-2.982 Mbp, with 23-59 contigs and GC  
227 content between 47.5% and 48.8% (Supplementary Table S1). The number of coding sequences  
228 ranged from 2,574-2,858 with 36-39 tRNAs encoding all twenty amino acids. ANI values  
229 between the four *Nitrotoga* genomes ranged from 85.9%-93.4% (Table 1), while AAI values had  
230 a similar range of 87.5%-94.6%. These ANI values were indicative of each enrichment  
231 containing a novel *Nitrotoga* species, as they fell below the assumed 95% ANI threshold that  
232 separates most bacterial species (Caro-Quintero & Konstantinidis, 2012; Jain *et al.*, 2017;  
233 Konstantinidis, Rosselló-móra, & Amann, 2017; Rodriguez-R & Konstantinidis, 2014). AAI  
234 values indicated these organisms were still highly conserved and likely shared many of the same  
235 traits. The SPKER *Nitrotoga* genome was considerably more divergent than the CP45, MKT, or  
236 LAW genomes.

237 Anvi'o pangenome analysis showed that coding sequences from all four genomes (10,666  
238 in total) grouped into 4,001 protein clusters (PCs) (Figure 2). The core genome was represented  
239 by 1,803 PCs found in all four *Nitrotoga* genomes (45.1% of total). Each individual genome  
240 (e.g., MKT only) contained 293-625 unique PCs, while 566 PCs were shared among two or three  
241 genomes. Of the 2,198 accessory genome PCs, 1,041 were annotated as hypothetical proteins.

242 Despite genomic level differences, the *Nitrotoga* 16S rRNA gene sequences were highly  
243 conserved (Figure 3; Supplementary Figure S1). *Nitrotoga* 16S rRNA genes were present at  
244 double coverage in all *Nitrotoga* genomes, indicating a gene duplication. The 16S rRNA gene  
245 from the SPKER genome had three single nucleotide variants (SNVs) present in ~50% of  
246 mapped reads, likely indicating small differences between the duplicate copies. A consensus  
247 sequence was used here, as the variants could not be isolated with paired reads. Among the four  
248 *Nitrotoga* 16S rRNA gene sequences assembled in this study, the most divergent are 99.4%  
249 identical across a 1,544 bp alignment (9 total mismatches). Pairwise comparisons of all 8  
250 enriched *Nitrotoga* 16S rRNA gene sequences (4 previous studies, 4 from this study) average  
251 99.5% identical across near full-length genes (Figure 3b) and a comparison of all 60 *Nitrotoga*-  
252 like sequences in Figure 3, comprising the known *Nitrotoga* genus, averaged 98.7%  
253 (Supplemental Figure 1). The highly conserved nature of *Nitrotoga* 16S rRNA gene sequences  
254 does not likely represent genome-level conservation across the genus, based on 16S  
255 rRNA:genome comparisons in the present study.

256

## 257 ***Nitrotoga* nitrogen metabolism**

### 258 *Nitrite oxidation*

259 Nitrite oxidoreductase (NXR) is a heterotrimeric enzyme (NxrABC) that oxidizes nitrite  
260 to nitrate, liberating two electrons from a water molecule (Supplemental Note). NXR is a  
261 member of the Type II DMSO reductase family of molybdenum enzymes. NXR is bound to the  
262 cell membrane and can be classified into at least two distinct phylogenetic and functional groups  
263 based on orientation towards the cytoplasm or periplasm (Lücker *et al.*, 2010). Oxidation kinetics  
264 studies have associated NXR orientation with ecological niche formation, as bacteria with

265 cytoplasmic-facing NXR (*Nitrobacter*, *Nitrococcus*, and *Nitrolancea*) typically dominate in  
266 relatively high nitrite environments over bacteria with periplasmic-facing NXR (*Nitrospira*,  
267 *Nitrospina*, and *Candidatus Nitromaritima*) (Kits *et al.*, 2017; Koch *et al.*, 2015; Lückner *et al.*,  
268 2010; Lückner, *et al.* 2013; Nowka *et al.*, 2015; Sorokin *et al.*, 2012; Spieck, *et al.* 1996; Spieck,  
269 *et al.* 1998; Starkenburg *et al.*, 2006). Periplasmic-facing NXR have the energetic benefit of H<sup>+</sup>  
270 release contributing to the proton motive force, while nitrite must be pumped into the cell for  
271 cytoplasmic-facing NXR.

272 *Nitrotoga nxr* genes were found on single contigs (6.7-9.5kb) within each genome  
273 forming an *nxrABC* operon, with an additional *nxD* chaperone (Supplemental Note). Based on  
274 the number of neighboring contigs in the assembly and read coverage estimates, the *nxr* genes in  
275 the CP45, LAW, and MKT genomes are thought to be duplicated. The SPKER *nxr* operon is  
276 likely present three times throughout the genome based on the same criteria.

277 *Nitrotoga* NxrA amino acid sequences were divergent from all other members of the  
278 Type II DMSO reductase enzyme family, and the closest relatives were putative archaeal nitrate  
279 reductase (NarG) proteins (Figure 4a). The deeply branching *Nitrotoga* NxrA amino acid  
280 sequences may represent a fourth evolutionary development of nitrite oxidation, separate from  
281 the cytoplasmic-facing, periplasmic-facing, and phototrophic *Thiocapsa* nitrite oxidizers (Hemp  
282 *et al.*, 2016; Lückner *et al.*, 2010). Interestingly, some contigs surrounding the *Nitrotoga nxr*  
283 operons contained putative transposase and integrase genes, possibly suggesting that the  
284 *Nitrotoga nxr* genes were horizontally transferred similar to the theory of periplasmic-facing *nxr*  
285 gene development (Lückner *et al.*, 2010). The *Nitrotoga* genus also represents the only known  
286 Betaproteobacterial lineage of nitrite-oxidation.

287 *Nitrotoga* NxrA from the CP45, LAW, and MKT genomes had a predicted twin-arginine  
288 translocation (Tat) signal peptide on the N-terminus (Figure 4b), which supports the excretion of  
289 this enzyme into the periplasm (Sargent, 2007). The SPKER genome NxrA was lacking a signal  
290 peptide, although an alignment showed that the first 14 amino acids may be missing, as the entire  
291 peptide was otherwise aligned without gaps. The gene was located at the end of a contig and was  
292 missing a start codon.

293 Conserved residues were previously predicted to play a role in binding a molybdopterin  
294 cofactor, a [4Fe-4S] cluster, and the nitrite/nitrate substrate in NxrA and nitrate reductase NarG  
295 (Martinez-espinoza *et al.*, 2007; Lückner *et al.*, 2010). All *Nitrotoga* NxrA shared the conserved  
296 residues for the molybdopterin, iron-sulfur cluster, and four of the five nitrite/nitrate binding  
297 residues. However, an analysis of the fifth residue revealed a surprising lack of conservation  
298 among all NOB with at least five different residues predicted in known NxrA sequences,  
299 including variations within *nxA* copies from a single genome (e.g., *Nitrospira nitrosa* has two  
300 *nxA* copies, one with asparagine and one with glycine in this same position) (Figure 4b). This  
301 residue may not play a critical role in nitrite/nitrate binding, or may play a role in the variable  
302 nitrite oxidation kinetics observed previously (Nowka *et al.*, 2015; Kits *et al.*, 2017).

303 *Nitrotoga* NxrB were lacking a signal peptide, but may be excreted into the periplasm via  
304 a ‘hitch-hiker’ method as described previously (Lückner *et al.*, 2010; Martinez-espinoza *et al.*,  
305 2007). All NxrB had coordinating residues for three [4Fe-4S] and one [3Fe-4S] cluster for  
306 electron conductance (Supplemental Figure 2).

307 One *Nitrotoga* NxrC predicted protein sequence was found in each genome with an N-  
308 terminal signal peptide for excretion. Signal peptides were previously observed in *Nitrospina*  
309 *gracilis* and *Candidatus Nitromaritima* NxrC (Lückner, *et al.* 2013; Ngugi, *et al.* 2015), however  
310 the predicted signal peptide cleavage site was located in the middle of a predicted

311 transmembrane region. Biochemical studies confirmed the membrane-association of the NXR  
312 holoenzyme in *Nitrospina* and *Nitrospira* (Bartosch *et al.*, 1999), indicating that NxrC were not  
313 fully translocated into the periplasm (Lücker *et al.*, 2010). *Nitrotoga* NxrC do not have predicted  
314 transmembrane regions, and are more similarly related to the soluble periplasmic gamma subunit  
315 of ethylbenzene dehydrogenase, which likely interact with cytochrome *c* proteins to shuttle  
316 electrons to the membrane (Kloer, *et al.* 2006); similar observations were made in the analysis of  
317 *Nitrospina gracilis* and *Candidatus Nitromaritima* genomes (Lücker, *et al.* 2013; Ngugi, *et al.*  
318 2015).

319 Overall, sequence and phylogenetic analyses indicated that *Nitrotoga* possess a form of  
320 NXR that is divergent from known NOB. Phylogenetically, the alpha subunit was deeply  
321 branched near putative bacterial and archaeal NarG, but maintains all necessary residues for  
322 nitrite oxidation. The NxrA and NxrC subunits had signal peptides for excretion to the periplasm,  
323 but all subunits were lacking transmembrane domains for anchoring in the cytoplasmic  
324 membrane. This may suggest that *Nitrotoga* have a soluble NXR periplasmic holoenzyme, which  
325 has never been observed in NOB.

326

### 327 *Dissimilatory and assimilatory nitrogen metabolism*

328 All *Nitrotoga* genomes had genes for a NirK dissimilatory nitrite reductase for the  
329 reduction of nitrite to nitric oxide. *nirK* genes have been found in all other NOB genomes except  
330 *Nitrolancea hollandica* (Lücker *et al.*, 2013; Sorokin *et al.*, 2012), but their ultimate role is still  
331 unclear. CP45, LAW, and MKT genomes encoded a nitric oxide dioxygenase (*hmp*), which  
332 catalyzes the conversion of nitric oxide to nitrate, and is evolutionarily related to an O<sub>2</sub>-binding  
333 protein similar to hemoglobin (Gardner *et al.*, 1998). The role of *nirK* and *hmp* in *Nitrotoga* is  
334 unknown.

335 The *Nitrotoga* genomes encoded genes for transport of nitrite/nitrate (*narK*),  
336 formate/nitrite, and ammonium (*amtB*). The predicted periplasmic orientation of *Nitrotoga* NXR  
337 excludes the need for nitrite import into the cytosol, however genes for an assimilatory NirBD  
338 nitrite reductase and cytochrome *c*551/*c*552 to catalyze the reduction of nitrite to ammonia were  
339 found. *Nitrotoga* may also assimilate ammonia released during cyanide detoxification  
340 (Supplemental Note). A *Nitrotoga* enrichment culture from coastal sands grew faster when  
341 ammonium was added to the culture medium (Ishii *et al.*, 2017), likely due to the reduced need  
342 for assimilatory nitrite reduction.

343

### 344 ***Nitrotoga* energy metabolism and reverse electron flow**

#### 345 *Nitrogen energetics*

346 A complete electron transport chain was present in the *Nitrotoga* genomes (Supplemental  
347 Figure 3). After electrons are passed from NXR to cytochrome *c*, they are transferred to oxygen  
348 via a terminal oxidase (Complex IV). All *Nitrotoga* genomes contained genes for a *cbb*<sub>3</sub>-type  
349 cytochrome *c* oxidase, a member of the C-class heme-copper oxidases with an exceptionally high  
350 affinity for oxygen (Morris and Schmidt, 2013). These genes did not form a distinct operon,  
351 however there were no other candidate terminal oxidase genes in most *Nitrotoga* genomes (see  
352 below). Organisms possessing *cbb*<sub>3</sub>-type oxidases, including the NOB *Nitrospina gracilis* and  
353 the phototrophic nitrite-oxidizer *Thiocapsa* KS1, are likely capable of growth in microoxic  
354 environments (Han *et al.*, 2011; Lücker *et al.*, 2013; Hemp *et al.*, 2016). For instance,  
355 *Nitrospina*-like bacteria have been found to play a crucial role in carbon fixation in marine  
356 oxygen minimum zones, due in part to their *cbb*<sub>3</sub>-type terminal oxidases (Füssel *et al.*, 2012,

2017; Pachiadaki *et al.*, 2017). The possession of a *cbb<sub>3</sub>*-type terminal oxidase indicates that *Nitrotoga* species likely continue aerobic metabolisms at nanomolar O<sub>2</sub> concentrations, allowing an incredibly wide habitat range (e.g., sediments, biofilms, marshes). *Nitrotoga* may also use alternative metabolisms (e.g., sulfur oxidation; see below) in low oxygen environments similar to *Nitrococcus mobilis* (Füssel *et al.*, 2017). The *Nitrotoga* genomes had several O<sub>2</sub> binding proteins including protoglobin, hemerythrin, and potentially nitric oxide dioxygenase, which may facilitate survival under low oxygen conditions.

Intriguingly, the SPKER genome contained an additional *bd*-type terminal cytochrome *c* oxidase, which was also observed in the genomes of two close relatives: *Sideroxydans lithotrophicus* ES-1 and *Gallionella capsiferriformans* ES-2 (Emerson *et al.*, 2013). This terminal oxidase may serve an additional role in energy conservation from organic carbon sources (see below), as *bd*-type terminal oxidases only receive electrons from the quinone pool, while *cbb<sub>3</sub>*-type terminal oxidases can receive electrons from cytochromes or the quinone pool (Borisov *et al.*, 2011; Morris and Schmidt, 2013).

An F-type ATPase (Complex V) was present in all four *Nitrotoga* genomes for ATP generation via the proton motive force. The periplasmic oxidation of nitrite contributes to the proton gradient, as two protons are released in the reaction. Inorganic phosphate for ATP generation can be stored as polyphosphate in *Nitrotoga* and released by polyphosphate kinase and inorganic pyrophosphatase enzymes.

When nitrite is the only energy source, *Nitrotoga* must generate NADH via reverse electron flow to support normal cellular processes. A canonical cytochrome *bc<sub>1</sub>* (Complex III), typically found in proteobacteria, was missing from *Nitrotoga* genomes. However, a suite of genes encoding an alternative complex III (*actAB1B2CDEF*) (Refojo *et al.*, 2012) was found in all *Nitrotoga* genomes and in the related iron-oxidizing bacteria of the Gallionellaceae family (Emerson *et al.*, 2013). Electrons are distributed from the alternative complex III via quinones to succinate dehydrogenase (Complex II) for biochemical intermediate production, or to NADH dehydrogenase (Complex I) for the reduction of NAD<sup>+</sup> (Supplemental Figure 3).

In addition to nitrite oxidation, NXR mediated nitrate reduction with electrons derived from alternative donors has been observed in members of the *Nitrobacter* and *Nitrospira* when oxygen is excluded (Bock *et al.*, 1990; Koch *et al.*, 2015; Sundermeyer-Klinger *et al.*, 1984). Given the genomic potential for survival in low-oxygen environments, we predict that *Nitrotoga* are also capable of nitrate reduction via NXR when oxygen is not available. Alternative electron donors including organic carbon, reduced sulfur compounds, or hydrogen gas (see below) could contribute to the electron transport with NXR functionally replacing the terminal oxidase (Supplemental Figure 3).

### Sulfur energetics

Genomic pathways indicated that *Nitrotoga* may be capable of sulfur oxidation. The recently described *Nitrococcus mobilis* Nb-231 genome encoded genes for aerobic sulfur oxidation, and their activity was confirmed in pure culture (Füssel *et al.*, 2017). *Nitrotoga* could likely harness the same sulfur sources using a periplasmic sulfite dehydrogenase (SOR) to oxidize sulfite (SO<sub>3</sub><sup>-</sup>) to sulfate (SO<sub>4</sub><sup>2-</sup>) with electron donation to cytochrome *c*, and a sulfide:quinone oxidoreductase (SQR) that couples hydrogen sulfide (H<sub>2</sub>S) oxidation to elemental sulfur (S<sup>0</sup>) and reduction of quinone (Supplemental Figure 3).

401



## 402 *Hydrogen energetics*

403 The catalytic subunit of a Group 3d [NiFe]-hydrogenase was identified in the CP45,  
404 LAW, and MKT genomes with the HydDB online tool (Søndergaard *et al.*, 2016). All other  
405 requisite genes were found nearby in the respective genomes. Group 3d [NiFe]-hydrogenases  
406 typically act as an NADH oxidoreductase, reducing NAD<sup>+</sup> to NADH with concomitant oxidation  
407 of H<sub>2</sub> to water (Peters *et al.*, 2015). Many sequenced NOB have a Group 3b [NiFe]-hydrogenase  
408 (Daims *et al.*, 2015; Füssel *et al.*, 2017; Lückner *et al.*, 2013) that is also capable of elemental  
409 sulfur or polysulfide reduction to H<sub>2</sub>S, an advantageous enzyme that is lacking in *Nitrotoga*  
410 genomes. *Nitrospira moscoviensis* utilizes a Group 2a [NiFe]-hydrogenase, and growth on H<sub>2</sub>  
411 was confirmed in culture (Koch *et al.*, 2016). Hydrogen oxidation could serve as yet another  
412 energy metabolism for *Nitrotoga* cells.

413

## 414 ***Nitrotoga* carbon metabolism**

### 415 *Carbon fixation*

416 *Nitrotoga* genomes had genes for the complete Calvin cycle (Supplemental Note),  
417 supporting CO<sub>2</sub> fixation for autotrophic growth. A sedoheptulose-bisphosphatase gene, an  
418 important intermediate enzyme needed to regenerate ribulose-1,5-bisphosphate, was missing but  
419 is also missing in the NOB *Nitrobacter winogradskyi*, and the ammonia-oxidizing  
420 betaproteobacteria *Nitrosomonas europaea*, and *Nitrospira multiformis* (Chain *et al.*, 2003;  
421 Norton *et al.*, 2008; Starkenburg *et al.*, 2006). Fructose 1,6-bisphosphatase, which typically plays  
422 a role in gluconeogenesis, is thought to fill the same role in organisms lacking sedoheptulose-  
423 bisphosphatase (Wei *et al.*, 2004; Yoo and Bowien, 1995) and was present in *Nitrotoga*  
424 genomes. *Nitrolancea*, *Nitrococcus*, and *Nitrobacter* also utilize the Calvin cycle (Sorokin *et al.*,  
425 2012; Füssel *et al.*, 2017; Starkenburg *et al.*, 2008).

426

### 427 *Organic carbon utilization*

428 *Nitrotoga* genomes encoded all genes for glycolysis, gluconeogenesis, the pentose  
429 phosphate pathway, and the tricarboxylic acid (TCA) cycle (Figure 5a). All necessary  
430 biochemical intermediates could be generated via these pathways, whether carbon is fixed via the  
431 Calvin cycle or imported into the cell. *Nitrotoga* genomes had genes for polysaccharide storage  
432 and exopolysaccharide synthesis, which may facilitate growth in biofilms (Supplemental Note).

433 Various sugar transporters are present in many NOB, including *Nitrococcus mobilis*,  
434 *Nitrospira inopinata*, *Nitrospina gracilis*, and *Nitrolancea hollandica* (Füssel *et al.*, 2017; Daims  
435 *et al.*, 2015; Lückner *et al.*, 2013; Sorokin *et al.*, 2012), but none were identified in *Nitrotoga*  
436 genomes. However, several genes involved in the phosphotransferase system (PTS) to import  
437 and phosphorylate sugars were found. The PTS was also found in *Nitrobacter winogradskyi* and  
438 *Thiocapsa* sp. KS1 (Starkenburg *et al.*, 2006; Hemp *et al.*, 2016). EI and HPr subunits of the PTS  
439 were both found in *Nitrotoga*, but a complete set of substrate-specific EIIA, EIIB, and EIIC  
440 components were not identified. Only ascorbate-specific EIIA and nitrogen regulatory EIIA  
441 subunits were found. *Nitrotoga* genomes did possess relatives of a recently purified ABC  
442 transporter (AfuABC) that was found to import phosphorylated sugars instead of iron as  
443 originally reported (Sit *et al.*, 2015).

444 *Nitrotoga* genomes had genes for an acetyl-CoA synthetase, which produces acetyl-CoA  
445 from acetate, suggesting the use of small organic carbon molecules if they can enter the cytosol.  
446 The incomplete *Nitrotoga* genomes, as well as otherwise complete organic carbon oxidation  
447 pathways, leaves potential for future identification of organic carbon transport. Preliminary

448 physiology tests showed a dramatically increased rate of nitrite oxidation when acetate and  
449 dextrose were provided to the cultures (data not shown).

450

### 451 ***Nitrotoga* iron acquisition**

452 Iron is often a limiting nutrient in oligotrophic freshwater environments. *Nitrotoga*  
453 genomes encoded an impressive array of genes useful for iron scavenging, including a complete  
454 TonB-dependent transport system with up to four copies of the outer membrane transport  
455 energization protein complex (ExbB/ExbD/TonB) and up to 16 TonB-dependent outer  
456 membrane siderophore receptors (CP45: 10; LAW: 7; MKT: 6; SPKER: 16). All of the TonB-  
457 dependent transporters (TBDTs) fell within the CirA and/or Fiu superfamilies (based on  
458 BLASTP and conserved domain results), which have been shown to transport a wide variety of  
459 siderophores including citrate, aerobactin, enterobactin, and salmochelin (Porcheron et al., 2013).  
460 Eight TBDTs (MKT: 0; CP45: 1; LAW: 1; SPKER: 5) were preceded by FecI-FecR transcription  
461 factors known to monitor ferric dicitrate concentrations within the cell and control transcription  
462 of TBDTs in *E. coli* (Braun et al., 2003). Siderophore synthesis seems unlikely within *Nitrotoga*  
463 (based on gene predictions; Supplemental Note), however *Nitrotoga* may scavenge siderophores  
464 from other bacteria within the community. Additionally, several iron pumps and iron storage  
465 proteins were present (Supplemental Note). Iron is a critical cofactor in the NXR enzyme and the  
466 varied iron acquisition methods of *Nitrotoga* may offer a competitive advantage for these  
467 organisms in iron-limited environments.

468

### 469 ***Nitrotoga* heavy metal transport and defense**

470 Molybdate ( $\text{MoO}_4^{2-}$ ) transport genes (*modABC*) were found in the CP45, LAW, and  
471 MKT genomes; while the SPKER genome had two *modA* copies but no *modB* or *modC*.  
472 However, the SPKER genome encoded a pair of molybdenum storage genes (*mosAB*) for  
473 intracellular storage of molybdenum (Fenske et al., 2005), not found in other *Nitrotoga*.  
474 Molybdate is the naturally occurring form of molybdenum, which is a necessary cofactor for  
475 NXR, so *Nitrotoga* cells must have at least one method of acquiring molybdenum.

476 Heavy metal efflux systems were prevalent in all *Nitrotoga* genomes. An *apaG* cobalt  
477 and magnesium efflux protein, as well as complete cobalt-zinc-cadmium resistance transporters  
478 (*czcABC*) were found in all genomes. A chromate transporter and divalent cation tolerance  
479 protein may help protect against heavy metal accumulation in *Nitrotoga*.

480 Arsenate ( $\text{AsO}_4^{3-}$ ) can enter cells through normal phosphate transport systems, and  
481 *Nitrotoga* had two different mechanisms for arsenate removal (Figure 5b). The LAW and  
482 SPKER genomes had *arsC* and *arsB* genes responsible for reducing arsenate to arsenite ( $\text{AsO}_3^{3-}$ ),  
483 and pumping arsenite from the cytoplasm, respectively. The CP45 and MKT genomes encoded  
484 an additional subunit, *arsA*, which acts as an ATPase to provide energy for export, while the  
485 ArsB pump can work alone with energy from the proton motive force.

486 All *Nitrotoga* genomes encoded the alpha (*cusA*) and beta (*cusB*) portions of the Cus  
487 Cu(I)/Ag(I) efflux system, composing the inner membrane transporter and periplasmic  
488 membrane fusion protein, respectively. The outer membrane factor channel protein, *cusC*, was  
489 only found in a complete operon in the LAW genome along with the *cusF* metallochaperone and  
490 *cusR-cusS* two-component signaling system. The MKT and SPKER genomes had *cusR* and *cusS*  
491 genes preceding a TolC-like outer membrane protein that could be CusC, but these were found  
492 separate from *cusAB*. A second copper exporter belonging to the Cue system was found in the  
493 LAW, MKT, and SPKER genomes consisting of a  $\text{Cu}^{2+}$  exporter (*copA*) and multicopper oxidase

494 (*cueO*). The CP45 genome alone had a *copZ* gene that serves as a chaperone for Cu<sup>+</sup> export via  
495 CopA.

496 Chromate (CrO<sub>4</sub><sup>2-</sup>) can enter cells via normal sulfate uptake systems. A putative soluble  
497 chromate reductase was found in all *Nitrotoga* genomes that can reduce the Cr(VI) found in  
498 chromate to the less toxic Cr(III), producing harmful reactive oxygen species (ROS) in the  
499 process which must be dealt with by other defenses (Thatoi *et al.*, 2014). In addition, a chromate  
500 transporter gene (*chrA*) was found in all genomes for the excretion of chromate ions from the  
501 cytoplasm.

502 A variety of other heavy metal defenses were found in individual *Nitrotoga* genomes  
503 (Figure 5b), for instance, the CP45 genome encoded a gold/copper resistance efflux pump  
504 belonging to the resistance nodulation division (RND) superfamily. The LAW genome encoded  
505 a mercury resistance system (*merRTPFA*) for Hg(II) transport and reduction to volatile Hg(0),  
506 and the LAW and SPKER genomes encoded *terC*-like proteins associated with tellurite  
507 resistance but appear to be lacking other required genes for tellurite efflux and/or reduction.  
508 Heavy metal transport is critical for cofactor acquisition (e.g., iron, molybdenum) and for  
509 defense against metals that are toxic at even low concentrations (e.g., mercury, arsenic).  
510 *Nitrotoga* genomes possessed varied metal transporters, which likely help support cells in the  
511 contaminated rivers sampled in this study.

512

### 513 **Other defense mechanisms in *Nitrotoga***

514 In support of the aerobic metabolisms of *Nitrotoga*, all four genomes contained necessary  
515 catalase, superoxide dismutase (Cu-Zn and Fe-Mn families), and peroxiredoxin genes to combat  
516 reactive oxygen species (ROS) (Figure 5). Cytochrome *c* peroxidase genes were found in the  
517 CP45, LAW, and MKT genomes to intercept peroxides in the periplasm with electrons donated  
518 from cytochrome *c*. Additionally, a rubrerythrin protein used to combat ROS specifically in  
519 anaerobic bacteria was found, a reminder of the likely microaerophilic or anaerobic ancestry of  
520 *Nitrotoga* within the Gallionellaceae.

521 A few antibiotic resistance genes were present among the *Nitrotoga* genomes, including a  
522 generic antibiotic biosynthesis monooxygenase, VanZ-like family proteins that may confer low-  
523 level antibiotic resistance, and a broad-spectrum multidrug efflux system (AcrAB-TolC). An  
524 erythromycin esterase homolog was found in the LAW genome, which may confer resistance to  
525 erythromycin. Preliminary physiology tests indicated that *Nitrotoga* continued nitrite oxidation  
526 in the presence of various antibiotics (data not shown).

527 The SPKER *Nitrotoga* genome possessed an interesting suite of genes responsible for  
528 DNA phosphorothiation (*iscS*, *dndBCDE*) (swapping a non-bridging oxygen atom for a sulfur  
529 atom) that offers resistance to a related restriction-modification system (*dptHGF*) (Xu *et al.*,  
530 2010) found nearby on the genome. DNA phosphorothiation was recently found to expand  
531 microbial growth range under multiple stresses due to its intrinsic antioxidant function (Yang *et al.*,  
532 2017). This ability may greatly expand the environments in which *Ca. Nitrotoga coloradensis*  
533 SPKER can proliferate, adding to its already wide potential range.

534

### 535 **Motility and chemotaxis**

536 All *Nitrotoga* genomes carried genes necessary for flagellar assembly and operation, as  
537 well as signal transducing pathways to stimulate gliding or twitching motility via a type IV pilus  
538 assembly. All genomes had general chemotaxis genes, but the SPKER genome was notably  
539 missing an aerotaxis receptor (*aer*) capable of detecting oxygen concentrations. If *Nitrotoga* are

540 indeed motile, they may migrate towards areas of greater reducing potential, and likely lose  
541 external motile structures when growing in biofilms or in culture, as the presence of flagella or  
542 pili have not been noted in previous studies (Alawi *et al.*, 2007, 2009; Hüpeden *et al.*, 2016;  
543 Lückner *et al.*, 2015; Ishii *et al.*, 2017).

544 The presence of a single acyl homoserine lactone synthase (LuxI homolog) in each  
545 genome, as well as several LuxR family transcriptional receptors and multiple homoserine efflux  
546 transporters (RhtA), indicate that *Nitrotoga* may use quorum sensing to communicate. Other  
547 NOB have been documented to use quorum sensing at high cell densities and the *Nitrotoga* LuxI  
548 homolog grouped phylogenetically with other sequenced Betaproteobacteria (Sayavedra-Soto *et al.*  
549 *et al.*, 2015; Mellbye *et al.*, 2017). *Nitrotoga* have been documented to grow in flocs and were  
550 shown to co-aggregate with AOB in WWTPs (Alawi *et al.*, 2007; Lückner *et al.*, 2015), so they  
551 may use quorum sensing to form microcolonies in response to their environment.

552

### 553 **Environmental distribution**

554 *Nitrotoga*-like 16S rRNA sequences were present in 2,410 different samples (from  
555 183,154 total SRA runs analyzed with IMNGS) (Figure 6). *Nitrotoga* containing samples  
556 comprised 70 different user-defined environments with a global distribution across seven  
557 continents spanning from the tropics to the poles (Figure 6C). About 9% of all freshwater  
558 environments (517/5,678) had *Nitrotoga*-like OTUs, with some communities consisting of nearly  
559 10% relative abundance of *Nitrotoga*-like OTUs. Nearly half of all wetland samples (24/49) had  
560 *Nitrotoga*-like OTUs with an average relative abundance of 0.89%, however most of these  
561 samples were part of the same BioProject. A high proportion of activated sludge (15%) and  
562 wastewater (17%) samples also harbored relevant populations of *Nitrotoga*-like OTUs (0.55%  
563 average relative abundance), similar to previous reports (Lückner *et al.*, 2015). The relative  
564 abundance of *Nitrotoga*-like OTUs ranged from 0.02%-13.03% across 540 soil samples. Of the  
565 few (6/6,233) marine samples that had *Nitrotoga*-like OTUs, most were found near freshwater  
566 rivers or wetlands.

567 A few samples in the SRA dataset had very high relative abundance of *Nitrotoga*-like  
568 OTUs compared to other samples. Several of these samples were associated with enrichment  
569 cultures from their respective environments (e.g., biofilm, hydrocarbon, and other). For example,  
570 a series of samples from a single study which involved enrichment from waterworks sand filters  
571 in the Netherlands had *Nitrotoga*-like OTUs comprising as much as 61% of the microbial  
572 community.

573 *Nitrotoga* distribution was also evaluated across 80 water column and sediment samples  
574 from three rivers in Colorado (Bear Creek, Cherry Creek, and South Platte River), based on  
575 amplification with general 16S rRNA gene primers targeting the total bacterial community  
576 (Supplemental Figure S4). *Nitrotoga*-like OTUs were identified in 85% of the samples, and  
577 *Nitrospira*-like OTUs were identified in 98% of the samples. Both groups co-occurred in 85% of  
578 the samples. No other NOB sequences were identified. Within each individual sample, the  
579 summed relative abundance ranged from 0-4.5% of the total bacterial community for *Nitrotoga*-  
580 like OTUs and 0-6.4% for *Nitrospira*-like OTUs. The summed relative abundance of *Nitrotoga*-  
581 like OTUs was greater than that of *Nitrospira*-like OTUs in 21% of the samples. *Nitrobacter* and  
582 *Nitrospira* are typically the more commonly studied NOB in freshwater systems (Daims *et al.*,  
583 2016; Cai *et al.*, 2018), but future efforts should now also consider *Nitrotoga* as potential  
584 important players in freshwater nitrite oxidation.



585 The *Nitrotoga* species presented here were enriched from the water column and  
586 sediments of urban- and agriculturally-impacted rivers, suggesting a broad habitat range within  
587 freshwater systems and a greater role in freshwater nitrification than previously expected.  
588 Sampling for these *Nitrotoga* enrichment cultures occurred in winter and spring when *in situ*  
589 water temperatures are typically <15°C and cultures were grown with 300 µM nitrite. All other  
590 reported *Nitrotoga* were enriched at low temperatures (4-17°C) and low nitrite concentration  
591 (300 µM) (Alawi *et al.*, 2007, 2009; Hüpeden *et al.*, 2016; Ishii *et al.*, 2017). Temperature and  
592 substrate availability may play a role in niche differentiation of NOB, with *Nitrotoga* increasing  
593 in abundance at colder temperatures and lower nitrite concentrations, but further molecular and  
594 physiology experiments would be needed to confirm this.

595

## 596 CONCLUSIONS

597 The enrichment of four novel *Nitrotoga* species, characterization of the first *Nitrotoga*  
598 genomes, and analysis of the distribution of *Nitrotoga* 16S rRNA sequences has expanded our  
599 knowledge of NOB ecology. The divergent NXR enzyme may indicate a novel evolution of  
600 nitrite oxidation in *Nitrotoga* separate from other known NOB. *Nitrotoga* have an exceptionally  
601 diverse metabolic profile, likely allowing proliferation under variable nutrient and oxygen  
602 conditions. The prevalence of *Nitrotoga*-like sequences found in globally distributed habitats  
603 (e.g., freshwater, soil, wetland, wastewater) suggests that *Nitrotoga* likely play a previously  
604 underappreciated functional role on a global scale. Future work should determine *Nitrotoga*  
605 ecophysiology, including nitrite oxidation kinetics and optimal growth conditions. Determining  
606 the functional redundancy and niche differentiation of *Nitrotoga* compared to other NOB will be  
607 important for understanding their role in nitrite oxidation under varying environmental  
608 conditions. Understanding the sensitivity or resilience of *Nitrotoga* to disturbances will be  
609 important for predicting their response to environmental change.

610

## 611 ACKNOWLEDGEMENTS

612 We thank Adrienne Narrowe and Christopher Miller for guidance on bioinformatic data  
613 analyses. We would also like to thank Hannah Clark, Nicklaus Deevers, Colin Beacom, Michael  
614 Kain, and Munira Lantz for their assistance in cultivation and preliminary physiology  
615 experiments and Sladjana Subotic and Anna Scopp for their help with environmental distribution  
616 sample collection and processing.

617

## 618 COMPETING INTERESTS

619 The authors declare no competing interests. Portions of this manuscript were previously  
620 published as a part of University of Colorado Denver Master's thesis submission (AB, 2017).  
621 Funding was provided by the University of Colorado, Denver and the City and County of  
622 Denver.

623

## 624 SUPPLEMENTARY INFORMATION

625 Supplementary Information accompanies this paper.

## 626 REFERENCES

- 627
- 628 Alawi M, Lipski A, Sanders T, Pfeiffer EM, Spieck E. (2007). Cultivation of a novel cold-  
629 adapted nitrite oxidizing betaproteobacterium from the Siberian Arctic. *ISME J* **1**: 256–264.
- 630 Alawi M, Off S, Kaya M, Spieck E. (2009). Temperature influences the population structure of  
631 nitrite-oxidizing bacteria in activated sludge. *Environ Microbiol Rep* **1**: 184–190.
- 632 Bankevich A, Nurk S, Antipov D, Gurevich AA, Dvorkin M, Kulikov AS, *et al.* (2012). SPAdes:  
633 A New Genome Assembly Algorithm and Its Applications to Single-Cell Sequencing. *J Comput*  
634 *Biol* **19**: 455–477.
- 635 Bartosch S, Wolgast I, Spieck E, Bock E. (1999). Identification of Nitrite-Oxidizing Bacteria  
636 with Monoclonal Antibodies Recognizing the Nitrite Oxidoreductase. *Appl Environ Microbiol*  
637 **65**: 4126–4133.
- 638 Bereschenko LA, Stams AJM, Euverink GJW, Van Loosdrecht MCM. (2010). Biofilm formation  
639 on reverse osmosis membranes is initiated and dominated by *Sphingomonas* spp. *Appl Environ*  
640 *Microbiol* **76**: 2623–2632.
- 641 Bock E, Koops H-P, Möller UC, Rudert M. (1990). A new facultatively nitrite oxidizing  
642 bacterium, *Nitrobacter vulgaris* sp. nov. *Arch Microbiol* **153**: 105–110.
- 643 Borisov VB, Gennis RB, Hemp J, Verkhovsky MI. (2011). The cytochrome bd respiratory  
644 oxygen reductases. *Biochim Biophys Acta - Bioenerg* 1398–1413.
- 645 Braun V, Mahren S, Ogierman M. (2003). Regulation of the Fecl-type ECF sigma factor by  
646 transmembrane signalling. *Curr Opin Microbiol* **6**: 173–180.
- 647 Cai M, Ng S-K, Lim CK, Lu H, Jia Y, Lee PKH. (2018). Physiological and Metagenomic  
648 Characterizations of the Synergistic Relationships between Ammonia- and Nitrite-Oxidizing  
649 Bacteria in Freshwater Nitrification. *Front Microbiol* **9**: 1–13.
- 650 Caro-Quintero A, Konstantinidis KT. (2012). Bacterial species may exist, metagenomics reveal.  
651 *Environ Microbiol* **14**: 347–355.
- 652 Chain P, Lamerdin J, Larimer F, Regala W, Lao V, Land M, *et al.* (2003). Complete genome  
653 sequence of the ammonia-oxidizing bacterium and obligate chemolithoautotroph *Nitrosomonas*  
654 *europaea*. *J Bacteriol* **185**: 2759–73.
- 655 Chen Y, Wu L, Boden R, Hillebrand A, Kumaresan D, Moussard H, *et al.* (2009). Life without  
656 light: microbial diversity and evidence of sulfur- and ammonium-based chemolithotrophy in  
657 Movile Cave. *ISME J* **3**: 1093–1104.
- 658 Christner BC, Priscu JC, Achberger AM, Barbante C, Carter SP, Christianson K, *et al.* (2014). A  
659 microbial ecosystem beneath the West Antarctic ice sheet. *Nature* **512**: 310–313.
- 660 Daims H, Lebedeva E V., Pjevac P, Han P, Herbold C, Albertsen M, *et al.* (2015). Complete  
661 nitrification by *Nitrospira* bacteria. *Nature*. e-pub ahead of print, doi: 10.1038/nature16461.
- 662 Daims H, Lückner S, Wagner M. (2016). A New Perspective on Microbes Formerly Known as  
663 Nitrite-Oxidizing Bacteria. *Trends Microbiol* **24**: 699–712.
- 664 Darling AE, Mau B, Perna NT. (2010). progressiveMauve : Multiple Genome Alignment with  
665 Gene Gain , Loss and Rearrangement. **5**. e-pub ahead of print, doi:  
666 10.1371/journal.pone.0011147.
- 667 Emerson D, Field EK, Chertkov O, Davenport KW, Goodwin L, Munk C, *et al.* (2013).  
668 Comparative genomics of freshwater Fe-oxidizing bacteria: Implications for physiology,  
669 ecology, and systematics. *Front Microbiol* **4**: 1–17.
- 670 Eren AM, Esen ÖC, Quince C, Vineis JH, Morrison HG, Sogin ML, *et al.* (2015). Anvi'o: an  
671 advanced analysis and visualization platform for 'omics data. *PeerJ* **3**: e1319.

672 Fan L, Song C, Meng S, Qiu L, Zheng Y, Wu W, *et al.* (2016). Spatial distribution of planktonic  
673 bacterial and archaeal communities in the upper section of the tidal reach in Yangtze River. *Sci*  
674 *Rep* **6**: 39147.

675 Fenske D, Gnida M, Schneider K, Meyer-Klaucke W, Schemberg J, Henschel V, *et al.* (2005). A  
676 new type of metalloprotein: The Mo storage protein from *Azotobacter vinelandii* contains a  
677 polynuclear molybdenum-oxide cluster. *ChemBioChem* **6**: 405–413.

678 Figdore BA, Stensel HD, Winkler M-KH. (2017). Comparison of different aerobic granular  
679 sludge types for activated sludge nitrification bioaugmentation potential. *Bioresour Technol* **251**:  
680 189–196.

681 Füssel J, Lam P, Lavik G, Jensen MM, Holtappels M, Günter M, *et al.* (2012). Nitrite oxidation  
682 in the Namibian oxygen minimum zone. *ISME J* **6**: 1200–1209.

683 Füssel J, Lüscher S, Yilmaz P, Nowka B, van Kessel MAHJ, Bourceau P, *et al.* (2017).  
684 Adaptability as the key to success for the ubiquitous marine nitrite oxidizer *Nitrocooccus*. *Sci Adv*  
685 **3**: e1700807.

686 Gardner PR, Gardner AM, Martin LA, Salzman AL. (1998). Nitric oxide dioxygenase: an  
687 enzymic function for flavohemoglobin. *Proc Natl Acad Sci U S A* **95**: 10378–10383.

688 Griess-Romijn van Eck E. (1966). Physiological and chemical tests for drinking water.  
689 (Nederlands Normalisatie Instituut).

690 Han H, Hemp J, Pace LA, Ouyang H, Ganesan K, Roh JH, *et al.* (2011). Adaptation of aerobic  
691 respiration to low O<sub>2</sub> environments. *Proc Natl Acad Sci* **108**: 14109–14114.

692 Hemp J, Lüscher S, Schott J, Pace LA, Johnson JE, Schink B, *et al.* (2016). Genomics of a  
693 phototrophic nitrite oxidizer: insights into the evolution of photosynthesis and nitrification. *ISME*  
694 *J* **10**: 1–10.

695 Huntemann M, Ivanova NN, Mavromatis K, Tripp HJ, Paez-Espino D, Palaniappan K, *et al.*  
696 (2015). The Standard Operating Procedure of the DOE-JGI Microbial Genome Annotation  
697 Pipeline (MGAP v 4 ). *Stand Genomic Sci* **10**: 1–6.

698 Hüpeden J, Wegen S, Off S, Lüscher S, Bedarf Y, Daims H, *et al.* (2016). Relative Abundance of  
699 *Nitrotoga* spp. in a biofilter of a cold freshwater aquaculture plant appears to be stimulated by a  
700 slightly acidic pH-value. *Appl Environ Microbiol* **82**: 1838–1845.

701 Ishii K, Fujitani H, Soh K, Nakagawa T, Takahashi R, Tsuneda S. (2017). Enrichment and  
702 Physiological Characterization of a Cold-Adapted Nitrite Oxidizer *Nitrotoga* sp. from Eelgrass  
703 Sediments. *Appl Environ Microbiol* **83**: 1–14.

704 Jain C, Rodriguez-R LM, Phillippy AM, Konstantinidis KT, Aluru S. (2017). High-throughput  
705 ANI Analysis of 90K Prokaryotic Genomes Reveals Clear Species Boundaries. *bioRxiv* 225342.

706 Kang DD, Froula J, Egan R, Wang Z. (2015). MetaBAT, an efficient tool for accurately  
707 reconstructing single genomes from complex microbial communities. *PeerJ* **3**: e1165.

708 Karkman A, Mattila K, Tamminen M, Virta M. (2011). Cold temperature decreases bacterial  
709 species richness in nitrogen-removing bioreactors treating inorganic mine waters. *Biotechnol*  
710 *Bioeng* **108**: 2876–2883.

711 Katoh K, Standley DM. (2013). MAFFT multiple sequence alignment software version 7:  
712 Improvements in performance and usability. *Mol Biol Evol* **30**: 772–780.

713 van Kessel MAHJ, Speth DR, Albertsen M, Nielsen PH, Op den Camp HJM, Kartal B, *et al.*  
714 (2015). Complete nitrification by a single microorganism. *Nature* **528**: 555–559.

715 Kinnunen M, Gulay A, Albrechtsen H-J, Dechesne A, Smets BF. (2017). *Nitrotoga* is selected  
716 over *Nitrospira* in newly assembled biofilm communities from a tap water source community at  
717 increased nitrite loading. *Environ Microbiol* **0**: 1–41.

- 718 Kits KD, Sedlacek CJ, Lebedeva E V., Han P, Bulaev A, Pjevac P, *et al.* (2017). Kinetic analysis  
719 of a complete nitrifier reveals an oligotrophic lifestyle. *Nature* **549**: 269–272.
- 720 Kloer DP, Hagel C, Heider J, Schulz GE. (2006). Crystal Structure of Ethylbenzene  
721 Dehydrogenase from *Aromatoleum aromaticum*. *Structure* **14**: 1377–1388.
- 722 Koch H, Galushko A, Albertsen M, Schintlmeister A, Spieck E, Richter A, *et al.* (2016). Growth  
723 of nitrite-oxidizing bacteria by aerobic hydrogen oxidation. *Research | Reports* **1696**: 761–763.
- 724 Koch H, Lückner S, Albertsen M, Kitzinger K, Herbold C, Spieck E, *et al.* (2015). Expanded  
725 metabolic versatility of ubiquitous nitrite-oxidizing bacteria from the genus *Nitrospira*. *Proc Natl*  
726 *Acad Sci* **112**: 11371–11376.
- 727 Konstantinidis KT, Rosselló-móra R, Amann R. (2017). Uncultivated microbes in need of their  
728 own taxonomy. *ISME J* **11**: 2399–2406.
- 729 Lagkouvardos I, Joseph D, Kapfhammer M, Giritli S, Horn M, Haller D, *et al.* (2016). IMNGS:  
730 A comprehensive open resource of processed 16S rRNA microbial profiles for ecology and  
731 diversity studies. *Sci Rep* **6**: 1–9.
- 732 Lebedeva E V., Alawi M, Jozsa PG, Daims H, Spieck E. (2008). Physiological and phylogenetic  
733 characterization of a novel lithoautotrophic nitrite-oxidizing bacterium, ‘*Candidatus Nitrospira*  
734 *bockiana*’. *Int J Syst Evol Microbiol* **58**: 242–250.
- 735 Letunic I, Bork P. (2016). Interactive tree of life (iTOL) v3: an online tool for the display and  
736 annotation of phylogenetic and other trees. *Nucleic Acids Res* **44**: W242–W245.
- 737 Li D, Liu CM, Luo R, Sadakane K, Lam TW. (2014). MEGAHIT: An ultra-fast single-node  
738 solution for large and complex metagenomics assembly via succinct de Bruijn graph.  
739 *Bioinformatics* **31**: 1674–1676.
- 740 Li D, Qi R, Yang M, Zhang Y, Yu T. (2011). Bacterial community characteristics under long-  
741 term antibiotic selection pressures. *Water Res* **45**: 6063–6073.
- 742 Lückner S, Nowka B, Rattei T, Spieck E, Daims H. (2013). The Genome of *Nitrospina gracilis*  
743 Illuminates the Metabolism and Evolution of the Major Marine Nitrite Oxidizer. *Front Microbiol*  
744 **4**: 1–19.
- 745 Lückner S, Schwarz J, Gruber-Dorninger C, Spieck E, Wagner M, Daims H. (2015). Nitrotoga-  
746 like bacteria are previously unrecognized key nitrite oxidizers in full-scale wastewater treatment  
747 plants. *ISME J* **9**: 708–720.
- 748 Lückner S, Wagner M, Maixner F, Pelletier E, Koch H, Vacherie B, *et al.* (2010). A *Nitrospira*  
749 metagenome illuminates the physiology and evolution of globally important nitrite-oxidizing  
750 bacteria. *Proc Natl Acad Sci U S A* **107**: 13479–13484.
- 751 Martinez-espinosa RM, Dridge EJ, Bonete MJ, Butt JN, Butler CS, Sargent F, *et al.* (2007).  
752 Look on the positive side ! The orientation , identification and bioenergetics of ‘Archaeal’  
753 membrane-bound nitrate reductases. *FEMS Microbiol Lett* **276**: 129–139.
- 754 Martiny JBH, Eisen JA, Penn K, Allison SD, Horner-Devine MC. (2011). Drivers of bacterial  
755 Beta-diversity depend on spatial scale. *Proc Natl Acad Sci* **108**: 7850–7854.
- 756 Mellbye BL, Spieck E, Bottomley PJ, Sayavedra-Soto LA. (2017). Acyl-Homoserine Lactone  
757 Production in Nitrifying Bacteria of the Genera *Nitrospira*, *Nitrobacter*, and *Nitrospria*  
758 Identified via a Survey of Putative Quorum-Sensing Genes. *Appl Environ Microbiol* **83**: 1–13.
- 759 Miller CS, Baker BJ, Thomas BC, Singer SW, Banfield JF, Pace N, *et al.* (2011). EMIRGE:  
760 reconstruction of full-length ribosomal genes from microbial community short read sequencing  
761 data. *Genome Biol* **12**: R44.
- 762 Moriya Y, Itoh M, Okuda S, Yoshizawa AC, Kanehisa M. (2007). KAAS: An automatic genome  
763 annotation and pathway reconstruction server. *Nucleic Acids Res* **35**: 182–185.



- 764 Morris RL, Schmidt TM. (2013). Shallow breathing: bacterial life at low O<sub>2</sub>. *Nat Rev Microbiol*  
765 **11**: 205–212.
- 766 Na H, Kim OS, Yoon SH, Kim Y, Chun J. (2011). Comparative approach to capture bacterial  
767 diversity of coastal waters. *J Microbiol* **49**: 729–740.
- 768 Ngugi DK, Blom J, Stepanauskas R, Stingl U. (2015). Diversification and niche adaptations of  
769 Nitrospina-like bacteria in the polyextreme interfaces of Red Sea brines. *ISME J* **10**: 1383–1399.
- 770 Norton JM, Klotz MG, Stein LY, Arp DJ, Bottomley PJ, Chain PSG, *et al.* (2008). Complete  
771 Genome Sequence of Nitrosospira multiformis, an Ammonia-Oxidizing Bacterium from the Soil  
772 Environment. *Appl Environ Microbiol* **74**: 3559–3572.
- 773 Nowka B, Daims H, Spieck E. (2015). Comparison of Oxidation Kinetics of Nitrite-Oxidizing  
774 Bacteria: Nitrite Availability as a Key Factor in Niche Differentiation. *Appl Environ Microbiol*  
775 **81**: 745–753.
- 776 Pachiadaki MG, Sintés E, Bergauer K, Brown JM, Record NR, Swan BK, *et al.* (2017). Major  
777 role of nitrite-oxidizing bacteria in dark ocean carbon fixation. *Science (80- )* **358**: 1046–1051.
- 778 Parada AE, Needham DM, Fuhrman JA. (2015). Every base matters: Assessing small subunit  
779 rRNA primers for marine microbiomes with mock communities, time series and global field  
780 samples. *Environ Microbiol*. e-pub ahead of print, doi: 10.1111/1462-2920.13023.
- 781 Parks DH, Imelfort M, Skennerton CT, Hugenholtz P, Tyson GW. (2015). CheckM: assessing  
782 the quality of microbial genomes recovered from isolates, single cells, and metagenomes.  
783 *Genome Res* **25**: 1043–55.
- 784 Peters JW, Schut GJ, Boyd ES, Mulder DW, Shepard EM, Broderick JB, *et al.* (2015). [FeFe]-  
785 and [NiFe]-hydrogenase diversity, mechanism, and maturation. *Biochim Biophys Acta - Mol Cell*  
786 *Res* **1853**: 1350–1369.
- 787 Pinto AJ, Marcus DN, Ijaz Z, Bautista-de los Santos QM, Dick GJ, Raskin L. (2015).  
788 Metagenomic Evidence for the Presence of Comammox Nitrospira-Like Bacteria in a Drinking  
789 Water System. *mSphere* **1**: e00054-15.
- 790 Porcheron G, Garénaux A, Proulx J, Sabri M, Dozois CM. (2013). Iron, copper, zinc, and  
791 manganese transport and regulation in pathogenic Enterobacteria: correlations between strains,  
792 site of infection and the relative importance of the different metal transport systems for  
793 virulence. *Front Cell Infect Microbiol* **3**: 1–24.
- 794 Pradhan S, Srinivas TNR, Pindi PK, Kishore HH, Begum Z, Singh PK, *et al.* (2010). Bacterial  
795 biodiversity from Roopkund Glacier, Himalayan mountain ranges, India. *Extremophiles* **14**: 377–  
796 395.
- 797 Quast C, Pruesse E, Yilmaz P, Gerken J, Schweer T, Yarza P, *et al.* (2013). The SILVA  
798 ribosomal RNA gene database project: Improved data processing and web-based tools. *Nucleic*  
799 *Acids Res* **41**: 590–596.
- 800 Quince C, Lanzen A, Davenport RJ, Turnbaugh PJ. (2011). Removing Noise From  
801 Pyrosequenced Amplicons. *BMC Bioinformatics* **12**. e-pub ahead of print, doi:  
802 10.1128/JVI.02271-09.
- 803 Ramanathan B, Boddicker AM, Roane TM, Mosier AC. (2017). Nitrifier Gene Abundance and  
804 Diversity in Sediments Impacted by Acid Mine Drainage. *Front Microbiol* **8**: 1–16.
- 805 Refojo PN, Teixeira M, Pereira MM. (2012). The Alternative complex III: Properties and  
806 possible mechanisms for electron transfer and energy conservation. *BBA - Bioenerg* **1817**: 1852–  
807 1859.
- 808 Roden EE, McBeth JM, Blöthe M, Percak-Dennett EM, Fleming EJ, Holyoke RR, *et al.* (2012).  
809 The microbial ferrous wheel in a neutral pH groundwater seep. *Front Microbiol* **3**: 1–18.

- 810 Rodriguez-R LM, Konstantinidis KT. (2014). Bypassing Cultivation To Identify Bacterial  
811 Species. *Microbe Mag* **9**: 111–118.
- 812 Rodriguez-R LM, Konstantinidis KT. (2016). The enveomics collection : a toolbox for  
813 specialized analyses of microbial genomes and metagenomes. *Peer J Prepr.* e-pub ahead of print,  
814 doi: 10.7287/peerj.preprints.1900v1.
- 815 Sargent F. (2007). The twin-arginine transport system: moving folded proteins across  
816 membranes. *Biochem Soc Trans* **35**: 835–847.
- 817 Sattin SR, Cleveland CC, Hood E, Reed SC, King AJ, Schmidt SK, *et al.* (2009). Functional  
818 shifts in unvegetated, perhumid, recently-deglaciated soils do not correlate with shifts in soil  
819 bacterial community composition. *J Microbiol* **47**: 673–681.
- 820 Saunders AM, Albertsen M, Vollesen J, Nielsen PH. (2015). The activated sludge ecosystem  
821 contains a core community of abundant organisms. *ISME J* **10**: 11–20.
- 822 Sayavedra-Soto L, Ferrell R, Dobie M, Mellbye B, Chaplen F, Buchanan A, *et al.* (2015).  
823 *Nitrobacter winogradskyi* transcriptomic response to low and high ammonium concentrations.  
824 *FEMS Microbiol Lett* **362**: 1–7.
- 825 Schmidt SK, Nemergut DR, Miller AE, Freeman KR, King AJ, Seimon A. (2009). Microbial  
826 activity and diversity during extreme freeze-thaw cycles in periglacial soils, 5400 m elevation,  
827 Cordillera Vilcanota, Peru. *Extremophiles* **13**: 807–816.
- 828 Sit B, Crowley SM, Bhullar K, Lai CCL, Tang C, Hooda Y, *et al.* (2015). Active Transport of  
829 Phosphorylated Carbohydrates Promotes Intestinal Colonization and Transmission of a Bacterial  
830 Pathogen. *PLoS Pathog* **11**: 1–22.
- 831 Søndergaard D, Pedersen CNS, Greening C. (2016). HydDB: A web tool for hydrogenase  
832 classification and analysis. *Sci Rep* **6**: 1–8.
- 833 Sorokin DY, Lückner S, Vejmekova D, Kostrikina N a, Kleerebezem R, Rijpstra WIC, *et al.*  
834 (2012). Nitrification expanded: discovery, physiology and genomics of a nitrite-oxidizing  
835 bacterium from the phylum Chloroflexi. *ISME J* **6**: 2245–2256.
- 836 Spieck E, Aamand J, Bartosch S, Bock E. (1996). Immunocytochemical detection and location of  
837 the membrane-bound nitrite oxidoreductase in cells of *Nitrobacter* and *Nitrospira*. *FEMS*  
838 *Microbiol Lett* **139**: 71–76.
- 839 Spieck E, Ehrich S, Aamand J, Bock E. (1998). Isolation and immunocytochemical location of  
840 the nitrite-oxidizing system in *Nitrospira moscoviensis*. *Arch Microbiol* **169**: 225–230.
- 841 Srinivas TNR, Singh SM, Pradhan S, Pratibha MS, Kishore KH, Singh AK, *et al.* (2011).  
842 Comparison of bacterial diversity in proglacial soil from Kafni Glacier, Himalayan Mountain  
843 ranges, India, with the bacterial diversity of other glaciers in the world. *Extremophiles* **15**: 673–  
844 690.
- 845 Starkenburg SR, Chain PSG, Sayavedra-Soto LA, Hauser L, Land ML, Larimer FW, *et al.*  
846 (2006). Genome sequence of the chemolithoautotrophic nitrite-oxidizing bacterium *Nitrobacter*  
847 *winogradskyi* Nb-255. *Appl Environ Microbiol* **72**: 2050–2063.
- 848 Starkenburg SR, Larimer FW, Stein LY, Klotz MG, Chain PSG, Sayavedra-Soto LA, *et al.*  
849 (2008). Complete genome sequence of *Nitrobacter hamburgensis* X14 and comparative genomic  
850 analysis of species within the genus *Nitrobacter*. *Appl Environ Microbiol* **74**: 2852–63.
- 851 Sundermeyer-Klinger H, Meyer W, Warninghoff B, Bock E. (1984). Membrane-bound nitrite  
852 oxidoreductase of *Nitrobacter*: evidence for a nitrate reductase system. *Arch Microbiol* **140**: 153–  
853 158.
- 854 Thatoi H, Das S, Mishra J, Rath BP, Das N. (2014). Bacterial chromate reductase, a potential  
855 enzyme for bioremediation of hexavalent chromium: A review. *J Environ Manage* **146**: 383–

856 399.  
857 Watson SW, Bock E, Valois FW, Waterbury JB, Schlosser U. (1986). *Nitrospira marina* gen.  
858 nov. sp. nov.: a chemolithotrophic nitrite-oxidizing bacterium. *Arch Microbiol* **144**: 1–7.  
859 Watson SW, Waterbury JB. (1971). Characteristics of two marine nitrite oxidizing bacteria,  
860 *Nitrospina gracilis* nov. gen. nov. sp. and *Nitrococcus mobilis* nov. gen. nov. sp. *Arch Mikrobiol*  
861 **77**: 203–230.  
862 Wei X, Sayavedra-Soto LA, Arp DJ. (2004). The transcription of the *cbb* operon in  
863 *Nitrosomonas europaea*. *Microbiology* **150**: 1869–1879.  
864 White CP, DeBry RW, Lytle DA. (2012). Microbial survey of a full-scale, biologically active  
865 filter for treatment of drinking water. *Appl Environ Microbiol* **78**: 6390–6394.  
866 Xu T, Yao F, Zhou X, Deng Z, You D. (2010). A novel host-specific restriction system  
867 associated with DNA backbone S-modification in *Salmonella*. *Nucleic Acids Res* **38**: 7133–7141.  
868 Yang J, Chen S, Li H. (2016). Dewatering sewage sludge by a combination of hydrogen  
869 peroxide, jute fiber wastes and cationic polyacrylamide. *Int Biodeterior Biodegrad* 1–7.  
870 Yang Y, Xu G, Liang J, He Y, Xiong L, Li H, *et al.* (2017). DNA Backbone Sulfur-Modification  
871 Expands Microbial Growth Range under Multiple Stresses by its anti-oxidation function. *Sci Rep*  
872 **7**: 1–9.  
873 Yoo J-G, Bowien B. (1995). Analysis of the *cbbF* genes from *Alcaligenes eutrophus* that encode  
874 fructose-1,6-/sedoheptulose-1,7-bisphosphatase. *Curr Microbiol* **31**: 55–61.  
875 Ziegler AS, McIlroy SJ, Larsen P, Albertsen M, Hansen AA, Heinen N, *et al.* (2016). Dynamics  
876 of the fouling layer microbial community in a membrane bioreactor. *PLoS One* **11**: 1–14.  
877  
878

879 **FIGURE LEGENDS**

880

881 **Table 1.** Average nucleotide identity (ANI) between enriched *Nitrotoga* genomes and close  
882 relative genomes available on NCBI (unhighlighted cells; top right) and average amino acid  
883 identity (AAI) pairwise comparisons (highlighted cells; bottom left).

884

885 **Figure 1.** Nitrite consumption by *Nitrotoga* enrichment cultures over time. Each enrichment  
886 culture was inoculated in three replicates, and nitrite concentration was quantified  
887 colorimetrically in triplicate at each time point. Error bars show the standard deviation of each  
888 time point; error bars that appear to be missing are too small to be visualized. Sterile FNOM was  
889 used as a control and plotted with each culture. Logarithmic declines in nitrite concentration  
890 were used to calculate the nitrite oxidation rate for each biological replicate. The average nitrite  
891 consumption per day is shown with standard deviation among triplicate cultures.

892

893 **Figure 2.** Anvi'o pangenome analysis of four *Nitrotoga* genomes. Coding sequences for all four  
894 genomes (10,666) in total grouped into 4,001 protein clusters (PCs), based on a pairwise BLAST  
895 of all coding sequences from all *Nitrotoga* genomes and clustering using the MCL algorithm  
896 (mcl=10). The core genome was represented by 1,803 PCs found in all four *Nitrotoga* genomes.  
897 Each individual genome (e.g., MKT only) contained 293-625 unique PCs not found in any other  
898 *Nitrotoga* genome.

899

900 **Figure 3. A)** Maximum likelihood phylogenetic tree of 16S rRNA gene sequences from  
901 representative *Ca. Nitrotoga* sequences and close relatives. Sequences were aligned across 1,422  
902 positions; phylogenetic trees were generated using RAxML (version 8.2.9) with 1,000 rapid  
903 bootstraps and the GTRGAMMA model of nucleotide substitution. Nodes with bootstrap support  
904 values  $\geq 50\%$  are shown with a black circle. A midpoint root was used when selecting outgroup  
905 sequences. Bolded sequence names have been enriched in culture. Nodes with a star represent  
906 organisms presented in this study. **B)** BLASTN comparisons of the near full-length 16S rRNA  
907 gene sequences from the eight known enriched *Nitrotoga* sp.

908

909 **Figure 4.** Phylogenetic and structural analysis of the alpha subunit of nitrite oxidoreductase  
910 (NxrA). **A)** Phylogeny of 122 members of the Type II DMSO reductase protein family aligned  
911 and manually trimmed to 1,651 amino acid positions. References were selected to include both  
912 cytoplasmic-facing “Low Affinity” and periplasmic-facing “High Affinity” NxrA (Ngugi *et al.*,  
913 2015), as well as other family members: PcrA (perchlorate reductase), EbdA (ethylbenzene  
914 dehydrogenase), DdhA (dimethylsulfide dehydrogenase), ClrA (chlorate reductase), SerA  
915 (selenite reductase), and NarG (nitrate reductase). Putative enzymes are marked as “put.” The  
916 number of sequences in collapsed nodes are shown in parentheses. RAxML rapid bootstrap  
917 support values  $\geq 90\%$  are marked with a black circle. **B)** Partial alignment of selected important  
918 residues in *Nitrotoga*, periplasmic-facing, and cytoplasmic-facing NxrA (including *Thiocapsa*).  
919 Highlights represent Tat signal peptides (Orange), Fe-S cluster binding residues (Yellow),  
920 molybdenum coordinating residues (Pink), and nitrite/nitrate binding residues (Light Blue).

921

922 **Figure 5.** Schematic representation of *Nitrotoga* genome features. **A)** The core *Nitrotoga*  
923 genome including predicted functions shared by all four genomes. The question mark located in  
924 the NxrC subunit symbolizes the uncertainty in whether or not the holoenzyme is anchored to the  
925 cell membrane. **B)** Predicted function of individual genomic features found within one or more  
926 genomes, but not shared among all four. Each genome had 178-301 unique hypothetical proteins,  
927 and an additional 171 hypothetical proteins were shared among two or three genomes.

928  
929 **Figure 6.** Global distribution of *Nitrotoga*-like sequences. OTUs from 16S rRNA gene amplicon  
930 studies deposited as SRA runs were clustered by IMNGS. All runs with OTUs  $\geq 97\%$  identity to  
931 cultured *Nitrotoga* 16S rRNA gene sequences (from this study), an alignment of at least 200 bp,  
932 and at least 100 total reads were kept. **A)** The percent of SRA runs with *Nitrotoga*-like OTUs  
933 within respective environments are shown with the number of SRA runs with *Nitrotoga*-like  
934 OTUs displayed above each bar. **B)** The relative abundance of *Nitrotoga*-like OTUs was  
935 averaged across all four queried *Nitrotoga* 16S rRNA gene sequences and plotted by  
936 environment. **C)** Global distribution of SRA runs with *Nitrotoga*-like OTUs. 484 of the 2,410  
937 SRA runs with *Nitrotoga*-like OTUs did not have geographic information available, including all  
938 of the “Hydrocarbon” environmental samples. Orange points represent sampling locations for the  
939 enrichment cultures presented in this study.

940  
941 **Supplemental Table 1.** Assembly statistics overview for *Nitrotoga* genomes. Percent  
942 completeness and contamination were estimated using CheckM. The asterisks indicate manual  
943 assignment of some marker genes used in completeness estimates (see Supplemental Note).

944  
945 **Supplemental Figure S1.** Pairwise BLAST comparisons of 60 *Nitrotoga* and *Nitrotoga*-like 16S  
946 rRNA gene sequences  $\geq 1,300$  bp presented as a heatmap. The phylogeny from Figure 3 is  
947 displayed on the left with branch lengths ignored. Bolded sequence names have been enriched in  
948 culture. Nodes with a star represent organisms presented in this study.

949  
950 **Supplemental Figure S2.** Partial alignment of important residues from selected NxrB subunits  
951 representing the *Nitrotoga* (Red), as well as canonical periplasmic-facing (Purple) and  
952 cytoplasmic-facing (Blue/Green) NXR. Highlights represent Fe-S cluster binding residues  
953 (Yellow).

954  
955 **Supplemental Figure S3.** Schematic of electron transfer in *Nitrotoga* based on genomic  
956 evidence. **A)** Canonical nitrite oxidation performed by NXR will liberate two electrons onto  
957 cytochrome *c* and flow forwards to the terminal oxidase (Complex IV), or backwards to  
958 regenerate NADH via Alternative Complex III and the quinone pool, or to generate biochemical  
959 intermediates via Complex II. The question mark located in the NxrC subunit symbolizes the  
960 uncertainty in whether or not the holoenzyme is anchored to the cell membrane. **B)** Aerobic  
961 respiration with alternative electron donors such as NADH derived from organic carbon  
962 utilization. **C)** Hypothesized anaerobic respiration with alternative electron donors (e.g., NADH)  
963 with the reduction of nitrate to nitrite via NXR as seen for other NOB. **D)** Electrons derived from



964 reduced sulfur compounds (sulfites or sulfides) are transferred to cytochrome *c* or quinone,  
965 which can enter at any point in electron transfer shown in panels B or C.

966

967 **Supplemental Figure S4.** Relative abundance of **A)** *Nitrotoga*- and **B)** *Nitrospira*-like 16S  
968 rRNA gene sequence OTUs from water column (“WC”) and sediment (“SED”) samples in Bear  
969 Creek (“BEAR”), Cherry Creek (“CHERRY”), and the upstream (“SP-UP”) and downstream  
970 (“SP-DOWN”) sites at their respective confluences with the South Platte River. OTUs were  
971 based on the amplification with general 16S rRNA gene primers targeting the total bacterial  
972 community and were grouped at 97% nucleotide identity. *Nitrotoga* and *Nitrospira* OTUs were  
973 identified based on BLAST searches against the SILVA rRNA gene database. **C)** Log ratio of the  
974 summed relative abundance of *Nitrotoga*- to *Nitrospira*-like 16S rRNA gene sequences.

975

976 **Supplemental File 1.** List of accessions for 16S rRNA genes used in Figure 3 and Supplemental  
977 Figure S1.

978

979 **Supplemental File 2.** List of accessions for Type II DMSO reductase proteins used in Figure 4.

## Unexpected versatility in the metabolism and ecophysiology of globally relevant nitrite-oxidizing *Nitrotoga* bacteria

Andrew M. Boddicker and Annika C. Mosier

### SUPPLEMENTAL NOTE

#### METHODS

##### Culture inoculation and growth

Freshwater Nitrite Oxidizer Medium (FNOM) was prepared by mixing 1 g NaCl, 0.4 g MgCl<sub>2</sub>·6H<sub>2</sub>O, 0.1 g CaCl<sub>2</sub>·2H<sub>2</sub>O, 0.5 g KCl, 100 µL 10X vitamin solution (Balch *et al.*, 1979), 1 mL 1M NaHCO<sub>3</sub>, and 300 µL 1M NaNO<sub>2</sub> per liter. The pH of the media was lowered to 7.0 using 10% HCl, then autoclaved. After autoclaving, 10 mL of separately autoclaved 4 g \* L<sup>-1</sup> KH<sub>2</sub>PO<sub>4</sub> and 1 mL trace metal solution (Biebl and Pfennig, 1978) were sterilely added to the media before storing at 4°C in the dark.

Two surface sediment samples were aseptically collected in February 2015 from the urban-impacted Cherry Creek in downtown Denver, CO (samples MKT and LAW) using a cut-off sterile 30 mL syringe and returned to the lab on ice. The same day, the top 0.5 cm of sediment was mixed with 10 mL sterile FNOM, then 1 mL of the sediment slurry was transferred to 100 mL FNOM for incubation at room temperature in the dark. Two water column samples were collected in May 2015 from two agriculturally-impacted rivers near Greeley, CO (about 100 km North of Denver, CO) (samples CP45 from the Cache La Poudre River and SPKER from the South Platte River). River water was kept on ice in the field and stored at 4°C upon return to the lab. After five days, 10 mL of each water sample was transferred to 100 mL FNOM and allowed to incubate at room temperature in the dark.

Nitrite consumption was regularly monitored in the cultures using a Griess nitrite color reagent (Griess-Romijn van Eck, 1966) composed of 0.5 g sulfanilamide, 0.05 g N-(1-naphthyl) ethylenediamine dihydrochloride, 5 mL 85% phosphoric acid, and MilliQ water to a final volume of 50 mL. Nitrite color reagent was mixed with the culture at a 1:10 ratio for visual estimates (+/-) or at a 1:1 ratio for quantitative spectrophotometric measurements.

To determine rates of nitrite oxidation, 100 µL of each sample line (CP45, LAW, MKT, SPKER) was inoculated into three bottles with 100 mL FNOM. At regular intervals, samples were collected in triplicate from each bottle and mixed with equal volumes of fresh Griess nitrite color reagent, then the optical density (OD) was measured at 540, 545, and 550 nm using a BioTek Synergy HT plate reader (BioTek, Winooski, VT). The mean maximum OD was used to calculate nitrite concentrations based on a standard curve of sterile media ranging from 0-0.3 mM nitrite with the Gen5 analysis software (BioTek, Winooski, VT). Sterile FNOM was used as a negative control. Nitrite oxidation rates were calculated across three time points (R<sup>2</sup> value of 0.93-1.0) within logarithmic nitrite consumption for each bottle.

##### DNA extraction

At mid- to late-phase of exponential nitrite oxidation, 400 mL of each culture was filtered onto a 0.2 µm Supor 200 filter (Pall, New York, NY). Filters were cut into small pieces with a sterile scalpel and aseptically placed into a Lysing Matrix E Bead Beating Tube (MP Biomedicals, Santa Ana, CA) with 800 µL lysing buffer (750 mM sucrose, 20 mM EDTA, 400 mM NaCl, 50 mM Tris (pH 8.4)) and 100 µL 10% SDS. Samples were vortexed briefly before

bead beating in a FastPrep-24 5G reciprocating homogenizer (MP Biomedicals, Santa Ana, CA) at 5 m/s for 30 seconds. Samples were incubated at 99°C for 1-3 minutes before adding 50 µL 20 mg/mL proteinase K, then incubated for 3-5.5 hours in a rotating hybridization oven at 55°C. Cold 100% ethanol (500 µL) was added to each sample in the same tube, and then DNA was purified using the DNeasy Blood and Tissue Kit (following manufacturer's instructions for purification) (Qiagen, Hilden, Germany). Extracted DNA was quantified with a Qubit fluorometer (Thermo Fisher, Waltham, MA), using the High Sensitivity dsDNA assay.

### Metagenome and *Nitrotoga* genome assembly

BBDuk v36.99 (<http://jgi.doe.gov/data-and-tools/bbtools>) was used to remove sequencing adapters and trim metagenomic reads (mink=8, hdist=1, qtrim=20, minlength=50, ftm=5, tpe, tbo). Read quality distributions were checked before and after trimming using FASTQC (<https://www.bioinformatics.babraham.ac.uk/projects/fastqc/>). Metagenomes were assembled from each culture using the filtered and trimmed reads with MEGAHIT v1.0.6.1 (k-min=32, k-max=121, k-step=10). Reads were mapped to the metagenome assemblies using BBDuk v36.x (<http://jgi.doe.gov/data-and-tools/bbtools/>) and contigs were binned using MetaBAT v.0.32.4 (--very-sensitive -B20 --unbinned) (Kang *et al.*, 2015). Preliminary taxonomy of each genomic bin was identified based on (1) BLAST searches of 16S rRNA gene sequences (assembled using EMIRGE (Miller *et al.*, 2011)) against the SILVA 16S rRNA gene database (release 123) (Quast *et al.*, 2013); and (2) the CheckM lineage workflow (Parks *et al.*, 2015). In each culture, only one putative NOB was identified belonging to the *Nitrotoga* genus.

Putative *Nitrotoga* bins of interest were manually refined using the Anvi'o metagenomics pipeline version 2.1.0 (Eren *et al.*, 2015). Putative *Nitrotoga* bins were combined in the CP45 and LAW metagenomes as these genomes were each split into two different bins. The CheckM merge function (Parks *et al.*, 2015) was used to supervise bin mergers and the lineage workflow was run again after merging to ensure the completeness estimates increased and contamination estimates did not. To check for contaminant and chimeric contigs, genes were called with Prodigal (Hyatt *et al.*, 2010) and BLASTP (Camacho *et al.*, 2009) was used to find the best hit for each predicted protein against the UniRef90 database (release 2016\_11) (Suzek *et al.*, 2014). Contigs with suspicious BLASTP taxonomy results were further scrutinized and removed upon later reassembly as needed.

For an iterative reassembly process of *Nitrotoga* genomes, reads were mapped to contigs of individual bins using BBSplit v36.x (<http://jgi.doe.gov/data-and-tools/bbtools/>) and were assembled using SPAdes v3.9.0 (Bankevich *et al.*, 2012) under the "careful" setting with MEGAHIT-assembled contigs given as "trusted contigs" and the same kmer range as used in metagenome assembly. Assembly graphs were visualized using Bandage (Wick *et al.*, 2015) to identify suspicious contigs. Contigs were removed from the bin before further reassembly if they had dissimilar best UniRef90 taxonomy hits compared to the rest of the contigs, inconsistent BLASTX taxonomy hits against the NCBI nr database, and were not found to be present within bins of other *Nitrotoga* genomes (from this study).

16S rRNA gene sequences (which rarely bin properly in metagenomic assemblies) were manually added to the *Nitrotoga* genome assemblies. To avoid selection bias, all 'unbinned' MEGAHIT-assembled contigs were searched against the SILVA 16S rRNA database (release 128) (Quast *et al.*, 2013) using BLASTN (Camacho *et al.*, 2009). All contigs with an alignment  $\geq 300$  bp ( $\geq 189$  for the LAW metagenome due to a *Nitrotoga* hit of that size) to any 16S rRNA gene from the database were added to the *Nitrotoga* genome assemblies. The resulting assembly



graph was visualized in Bandage (Wick *et al.*, 2015), and the internal BLAST function was used to search for all added 16S rRNA suspected contigs. In each of the four *Nitrotoga* genomes, only one 16S rRNA gene assembled on a contig with paired reads mapped to other *Nitrotoga* genomic contigs. The assembled 16S rRNA genes from each culture were most similar to *Nitrotoga* sequences in SILVA. The correct contig containing the *Nitrotoga* 16S rRNA gene was kept, and others removed from the assembly.

A similar process was followed for adding contigs with nitrite oxidoreductase (*nxr*) gene sequences to the assembly. Predicted protein sequences from ‘unbinned’ MEGAHIT-assembled contigs were searched for members of the Type II DMSO reductase family (TIGR03479, TIGR03478, TIGR03477, TIGR03482) using HMMER3 (Eddy, 2011). All contigs with hits were added to the SPAdes reassembly if they had a coverage estimate that was similar to, or higher than, that of the respective *Nitrotoga* genome. Ultimately, a single unbinned contig in each of the CP45, LAW, and MKT metagenomes held all *nxr* genes. Eight unbinned contigs from the SPKER metagenome were used to assemble the *nxr* contig in the SPKER *Nitrotoga* genome.

Analysis of single nucleotide variants (SNVs) in Anvi’o (Eren *et al.*, 2015) indicated 32 SNVs across the SPKER *nxrA* gene, which are likely the result of variations between the three predicted *nxrA* copies in the SPKER *Nitrotoga* genome, and/or contaminant reads from one or more of the suspected *nxr* MEGAHIT-assembled contigs. Four of the SNVs were found in ~33% of mapped reads, indicating they may represent variants on one of the three suspected *nxrA* gene copies and caused contig breakage during assembly. None of the other *Nitrotoga nxrA* genes had SNVs and the SPKER *Nitrotoga nxrBCD* genes were intact with no SNVs. A consensus *nxrA* sequence is presented in this study for the SPKER *Nitrotoga* genome, as paired reads could not resolve the SNVs into individual gene copies.

### **Relative abundance of *Nitrotoga* in creek sediments and water column**

Sediment samples from Bear Creek, Cherry Creek, and the South Platte River were collected using a sterile spatula and sterile petri dish. Prior to sampling at each site, the spatula was rinsed with 70% ethanol and wiped dry with a clean Kimwipe. The spatula was then rinsed with sterile water to remove residual ethanol, followed by site water. The bottom of the sterile petri dish was then placed down into the sediment, open-side-down. The sterile spatula was slid under the dish, trapping the sediment in the petri dish. The lid was put on the petri dish and wrapped in parafilm. All sediment samples were stored on dry ice for a maximum of three hours before arriving at the lab for permanent storage at -80°C.

Water samples were collected using sterile 1 L Nalgene bottles submerged approximately 15 cm in creek water undergoing constant flow. Nalgene bottles were rinsed with site water three times before sample acquisition. Following sample collection, samples were immediately placed on ice and transferred to the lab for processing for filtration within three hours. Water column samples were filtered onto 25 mm diameter, 0.22 µm pore size Supor membrane (Pall Corporation, Ann Arbor, MI) filters in a Swinnex (Merck Millipore, Burlington, MA) filter housing using a peristaltic pump (Series II Geopump, Geotech Environmental Equipment, Denver, CO). Following sample filtration, filters were stored at -80°C until DNA extraction. Pump tubing was sterilized prior to filtering each sample by sequential rinses of the pump tubing: (1) rinsed with 250 mL of autoclaved MilliQ water; (2) recirculation of 500 mL of 10% HCl through the tubing for three minutes; (3) rinsed again with 250 mL of autoclaved MilliQ water; and (4) rinsed with 250 mL of site water.

DNA was extracted using the MP Biomedicals FastDNA Spin Kit for Soil (MP Biomedicals, Santa Ana, CA) according to kit instructions with homogenization in the FastPrep-24 5G reciprocating homogenizer at 6.0 m/sec for 40 seconds. The Qubit dsDNA HS and dsDNA BR Assay kits (Life Technologies, Carlsbad, CA) were used to determine the DNA concentration of extracts. Qubit DNA quantitation was run in duplicate to determine the average DNA concentration for each DNA extract.

Sequence processing was conducted using QIIME (Caporaso *et al.*, 2010). Paired-end reads were joined using fastq-join and filtered to a Phred quality score of 20. Sequences with < 80 bp merge length were discarded. The last 20 bp was removed from both ends of sequences after merging to remove primers. Processed reads were clustered into operation taxonomic units (OTUs) at 97% sequence identity and the DECIPHER web tool was used to check for chimeras (short sequences) (Wright *et al.*, 2012). Putative chimeras as well as OTUs with relative abundance < 0.05% were removed. All chloroplast OTUs and OTUs found in sequencing controls were also removed before analysis. Final taxonomy was assigned using a BLAST search against the SILVA 16S rRNA database (release 128) (Quast *et al.*, 2013).

## RESULTS AND DISCUSSION

### *Nitrotoga* genome assembly

CheckM indicated that the *Nitrotoga* genomes were near-complete based on a collection of 419 single-copy gene markers conserved within the Betaproteobacteria (UID3959). The LAW, MKT, and SPKER genomes were predicted to be 98.2% complete, while the CP45 genome was 97.0% complete due to the loss of three markers that were present on small contigs (<2 kb) removed before annotation (PF00731.15 AIR carboxylase; PF01259.13 Phosphoribosylaminoimidazolesuccinocarboxamide synthase; and TIGR02392 alternative sigma factor RpoH). All genomes were missing the same five marker genes (TIGR01745 aspartate-semialdehyde dehydrogenase; TIGR01574 tRNA-i(6)A37 thiotransferase enzyme MiaB; PF03618.9 Kinase-PPPase; TIGR01161 phosphoribosylaminoimidazole carboxylase, ATPase subunit; and PF13603.1 Leucyl-tRNA synthetase, Domain 2). A manual search for each marker using HMMER3 (Eddy, 2011) revealed strong (evalue <1e-41) hits to four of the five missing genes in all genomes. The identification of these four markers improved completeness estimates to 99.8% complete. The fifth marker (PF03618.9) had no hits from the *Nitrotoga* predicted protein sequences and was not found on any contig with suitable coverage among the ‘unbinned’ contigs. Homologs to this marker gene are found in the closest sequenced relatives: *Sideroxydans lithotrophicus* ES-1, *Gallionella capsiferriformans* ES-2, and *Gallionella acididurans* ShG14-8.

*Nitrotoga* genomes were estimated to contain 0.24-0.3% contamination. Specifically, the CP45, LAW, MKT genomes had duplications of the same two markers (PF09976.4 Tetratricopeptide repeat-like domain; and PF08340.6 domain of unknown function 1732), while the SPKER genome only had a duplicate of PF08340.6. Secondary copies had a drastically reduced HMM hit (evalue 2-11 orders of magnitude higher), so they may represent false-positives. None of the published Gallionellaceae genomes showed duplications of these genes.

## ***Nitrotoga* nitrogen metabolism**

### *Nitrite oxidation*

NxrA contains a specific nitrite/nitrate substrate binding channel, a molybdenum-bis(pyranopterin guanosine dinucleotide) (Mo-bisPGD) motif, and one iron-sulfur cluster for the conduction of electrons to the beta subunit (Daims, Lückner, & Wagner, 2016; Grimaldi, *et al.* 2013; Hille, Hall, & Basu, 2014; Magalon, *et al.* 2011). The beta subunit acts as an electron conductor, passing through three [4Fe-4S] clusters and one [3Fe-4S] cluster (Daims, Lückner, & Wagner, 2016; Grimaldi *et al.*, 2013; Hille, Hall, & Basu, 2014; Magalon, *et al.* 2011). Finally, the variable gamma subunit, NxrC, is thought to bind 1-2 heme groups to transfer electrons to a cytochrome *c*, and is likely bound to the membrane, anchoring the NXR holoenzyme (Daims *et al.*, 2016). NOB genomes with periplasmic-facing NXR typically encode multiple candidate *nxC* genes, with varying sizes and heme-binding components (Daims *et al.*, 2015; Lückner *et al.*, 2010; Lückner, *et al.*, 2013; van Kessel *et al.*, 2015)

*Nitrotoga nxr* genes were ultimately placed on single contigs within each genome forming an *nxC* operon. *Nitrotoga* NxrA (TIGR03479,  $\text{evalue} < 2.2\text{e-}74$ ) was 1169 amino acids in length in the CP45, MKT, and LAW genomes and 1155 aa in the SPKER genome due to a truncated N-terminus (Figure 4b). *Nitrotoga* NxrB (TIGR03478,  $\text{evalue} < 2.6\text{e-}73$ ) was 385 amino acids long in all genomes, while *Nitrotoga* NxrC (TIGR03477,  $\text{evalue} < 2.8\text{e-}36$ ) was 371 or 372 amino acids in length. Each contig also contained an NxrD delta subunit (TIGR03482,  $\text{evalue} < 8.8\text{e-}26$ ), which may act as a chaperone similar to TorD used in molybdenum cofactor assembly and protein folding (Hille *et al.*, 2014; Lückner *et al.*, 2013; Magalon *et al.*, 2011; Ngugi *et al.*, 2015).

Two conserved hypothetical proteins were found downstream of the *nxC* operon in most *Nitrotoga* genomes: a 70 amino acid protein of unknown function, and a 341 amino acid protein with conserved domains related to iron-transfer P-loop NTPases, which are required for cytosolic Fe-S cluster assembly (factor NBP35). These two genes are located on the same contig as the *nxC* genes in the CP45, LAW, and MKT genomes. The SPKER *nxC* contig contained only the *nxC* operon, but the 341 amino acid protein was found on a neighboring contig. The CP45 *nxC* contig had additional truncated hypothetical proteins on either end of the contig.

*Nitrotoga* NXR subunits have a conserved protein structure that is highly divergent from other NXRs and members of the Type II DMSO reductase family of enzymes (Figure 4). *Nitrotoga* NxrA subunits were at least 98.1% identical to each other across the 1169 amino acid protein but were as low as 84.1% identical across the nucleotide alignment (SPKER vs LAW). Similar patterns were seen with the beta subunit ( $\geq 97.9\%$  amino acid identity;  $\geq 87.0\%$  nucleotide identity), while the gamma subunit was slightly more divergent ( $\geq 92.8\%$  amino acid identity;  $\geq 85.3\%$  nucleotide identity). The delta chaperone was also highly conserved between *Nitrotoga* genomes ( $\geq 96.4\%$  amino acid identity;  $\geq 87.6\%$  nucleotide identity).

### *Dissimilatory and assimilatory nitrogen metabolism*

Urea is an important source of ammonia for many NOB (e.g., *Nitrospina* and some *Nitrospira*) (Daims *et al.*, 2016; Ushiki *et al.*, 2018). A urea-binding-like protein was found in the LAW genome located near most of the nitrogen transport systems (i.e., *narK* nitrite/nitrate transporter, nitrogen metabolism transcription factor *ntrC*, formate/nitrite transporter, *nirK* assimilatory nitrite reductase, and ammonia transporter *amtB*). However, no urea transporter or urease genes were identified in any *Nitrotoga* genomes.

Each *Nitrotoga* genome contained a nitrilase enzyme that degrades nitriles (C≡N bonds) to ammonia and carboxylic acids. Nitrilase could potentially be used as defense against simple nitriles like cyanide or to cleave ammonia for assimilation within the *Nitrotoga* cells. Previously, a cyanate-degrading NOB (via a cyanase enzyme) was shown to participate in ‘reciprocal feeding’ by releasing ammonia for consumption by ammonia-oxidizers (Palatinszky *et al.*, 2015). However, no cyanate transporter or cyanase genes were identified in any *Nitrotoga* genomes. Each *Nitrotoga* genome did contain four unique genes with rhodanese domains, which are known to detoxify cyanide (CN<sup>-</sup>) using thiosulfate (S<sub>2</sub>O<sub>3</sub><sup>2-</sup>) as a sulfur donor, producing thiocyanate (SCN<sup>-</sup>) and sulfite (SO<sub>3</sub><sup>2-</sup>). One of these genes was predicted to be anchored into the cell membrane and face the periplasm. Thus, *Nitrotoga* may be capable of detoxifying cyanide while also contributing to their sulfur metabolism via sulfite production (see *sulfur energetics* section).

### ***Nitrotoga* carbon metabolism**

#### *Carbon fixation*

The CP45, LAW, and MKT genomes had two copies of both small and large ribulose 1,5-bisphosphate carboxylase (RuBisCO), the key enzyme for CO<sub>2</sub> fixation, while the SPKER genome had single copies. All *Nitrotoga* genomes had an active form IC/ID RuBisCO, while the second copy in the CP45, LAW, and MKT genomes was related to form IA RuBisCO. All form I RuBisCO are likely active in carbon fixation (unlike most Form IV RuBisCO (Tabita *et al.*, 2007)) and subtypes IA, IC, and ID have been found across the Proteobacteria (Tabita *et al.*, 2008).

The two key enzymes of the reverse tricarboxylic acid (rTCA) cycle (oxoglutarate:ferredoxin oxidoreductase and ATP-citrate lyase) were missing from *Nitrotoga* genomes. The rTCA cycle is used in *Nitrospira*, *Nitrospina*, and *Ca. Nitromaritima* species to fix carbon dioxide (Lücker *et al.*, 2010, 2013; Ngugi *et al.*, 2015), while the *Nitrolancea*, *Nitrococcus*, and *Nitrobacter* utilize the Calvin cycle (Sorokin *et al.*, 2012; Füssel *et al.*, 2017; Starkenburg *et al.*, 2008).

#### *Polysaccharide storage and Exopolysaccharide*

Glycogen and starch storage is likely in *Nitrotoga* given the presence of key genes (i.e., glucose-1-phosphate adenylyltransferase, 1,4-alpha-glucan branching enzymes, alpha-amylase, starch synthase, and starch phosphorylase). A pathway for cellulose production (cellulose synthase (UDP-forming)) and hydrolysis (cellulase/endoglucanase and cellobiose phosphorylase) to glucose 1-phosphate was also present in *Nitrotoga* genomes, except the LAW genome was missing a cellobiose phosphorylase gene.

Exopolysaccharide (EPS) synthesis is also likely in *Nitrotoga*, as an extensive array of PEP-CTERM exopolysaccharide sorting enzymes (Haft *et al.*, 2006), polysaccharide export pumps, and saccharide modifiers (i.e., UDP-glucose dehydrogenase, polyprenyl glycosylphosphotransferase, D-alanyl-lipoteichoic acid acyltransferase) were present in all genomes. EPS production has been observed in *Nitrotoga* via microscopy (Ishii *et al.*, 2017), and may explain the formation of microcolonies in WWTPs (Lücker *et al.*, 2015).

### ***Nitrotoga* iron acquisition**

The CP45, LAW, and SPKER genomes included two genes with sequence similarity to IucA/IucC and FhuF domains that are commonly found in nonribosomal peptide synthase-

independent siderophore biosynthesis (Challis, 2005). However, it is unclear whether *Nitrotoga* are capable of complete siderophore biosynthesis as these genes also resemble a ferric reductase, which may be used to reduce siderophore-bound iron prior to transport across the cell membrane. Reduced  $\text{Fe}^{2+}$  is likely transported into the cytoplasm via an EfeU Iron/Lead type transporter, while an FhuDBC ABC-type transporter can transport some complete siderophores across the cell membrane. An AfuABC ABC-type transporter was also found with predicted  $\text{Fe}^{3+}$  transporter activity, however recent evidence suggests this may actually be a phosphorylated carbohydrate pump (Sit *et al.*, 2015).

$\text{Fe}^{3+}$  storage is possible with bacterioferritin (BfrB) and a bacterioferritin-associated ferredoxin (Bfd) encoded in *Nitrotoga* genomes. However, a ferredoxin NADP reductase (Fpr) responsible for transferring electrons to Bfd, and ultimately  $\text{Fe}^{3+}$  for mobilization into the cytoplasm (Rivera, 2017; Wang *et al.*, 2015), was not detected in *Nitrotoga* genomes. A short ferritin-like protein, also useful for iron storage, was encoded in the CP45, LAW, and SPKER genomes although its function is unknown. Fur family transcriptional regulators, which measure cytoplasmic iron concentrations, were found near the *afuABC* operon and a zinc/cadmium transporter in *Nitrotoga* genomes and may respond to changes in iron availability.

A heme-degrading monooxygenase gene, *hmoA*, used to harvest heme from a host, was found in all *Nitrotoga* genomes. The presence of two putative hemolysin genes in all *Nitrotoga* genomes, and an additional heme oxygenase in the CP45 genome, may support an antagonistic role of *Nitrotoga* in bacterial communities. However, heme binding and uptake systems were not observed, and only the LAW genome encodes a Type I protein secretion system.



## REFERENCES

- Balch WE, Fox GE, Magrum LJ, Woese CR, Wolfe RS. (1979). Methanogens: Reevaluation of a Unique Biological Group. *Microbiol Rev* **43**: 260–296.
- Bankevich A, Nurk S, Antipov D, Gurevich AA, Dvorkin M, Kulikov AS, *et al.* (2012). SPAdes: A New Genome Assembly Algorithm and Its Applications to Single-Cell Sequencing. *J Comput Biol* **19**: 455–477.
- Biebl H, Pfennig N. (1978). Growth yields of green sulfur bacteria in mixed cultures with sulfur and sulfate reducing bacteria. *Arch Microbiol* **117**: 9–16.
- Camacho C, Coulouris G, Avagyan V, Ma N, Papadopoulos J, Bealer K, *et al.* (2009). BLAST plus: architecture and applications. *BMC Bioinformatics* **10**: 1.
- Caporaso JG, Kuczynski J, Stombaugh J, Bittinger K, Bushman FD, Costello EK, *et al.* (2010). QIIME allows analysis of high-throughput community sequencing data. *Nat Methods* **7**: 335–336.
- Challis GL. (2005). A widely distributed bacterial pathway for siderophore biosynthesis independent of nonribosomal peptide synthetases. *ChemBioChem* **6**: 601–611.
- Daims H, Lebedeva E V., Pjevac P, Han P, Herbold C, Albertsen M, *et al.* (2015). Complete nitrification by *Nitrospira* bacteria. *Nature*. e-pub ahead of print, doi: 10.1038/nature16461.
- Daims H, Lückner S, Wagner M. (2016). A New Perspective on Microbes Formerly Known as Nitrite-Oxidizing Bacteria. *Trends Microbiol* **24**: 699–712.
- Eddy SR. (2011). Accelerated profile HMM searches. *PLoS Comput Biol* **7**. e-pub ahead of print, doi: 10.1371/journal.pcbi.1002195.
- Eren AM, Esen ÖC, Quince C, Vineis JH, Morrison HG, Sogin ML, *et al.* (2015). Anvi'o: an advanced analysis and visualization platform for 'omics data. *PeerJ* **3**: e1319.
- Füssel J, Lückner S, Yilmaz P, Nowka B, van Kessel MAHJ, Bourceau P, *et al.* (2017). Adaptability as the key to success for the ubiquitous marine nitrite oxidizer *Nitrococcus*. *Sci Adv* **3**: e1700807.
- Griess-Romijn van Eck E. (1966). Physiological and chemical tests for drinking water. (Nederlands Normalisatie Instituut).
- Grimaldi S, Schoepp-Cothenet B, Ceccaldi P, Guigliarelli B, Magalon A. (2013). The prokaryotic Mo/W-bisPGD enzymes family: A catalytic workhorse in bioenergetic. *Biochim Biophys Acta - Bioenerg* **1827**: 1048–1085.
- Haft DH, Paulsen IT, Ward N, Selengut JD. (2006). Exopolysaccharide-associated protein sorting in environmental organisms: the PEP-CTERM/EpsH system. Application of a novel phylogenetic profiling heuristic. *BMC Biol* **4**: 29.
- Hille R, Hall J, Basu P. (2014). The Mononuclear Molybdenum Enzymes. *Chem Rev* **114**: 3963–4038.
- Hyatt D, Chen G-L, Locascio PF, Land ML, Larimer FW, Hauser LJ. (2010). Prodigal: prokaryotic gene recognition and translation initiation site identification. *BMC Bioinformatics* **11**: 119.
- Ishii K, Fujitani H, Soh K, Nakagawa T, Takahashi R, Tsuneda S. (2017). Enrichment and Physiological Characterization of a Cold-Adapted Nitrite Oxidizer *Nitrotoga* sp. from Eelgrass Sediments. *Appl Environ Microbiol* **83**: 1–14.
- Kang DD, Froula J, Egan R, Wang Z. (2015). MetaBAT, an efficient tool for accurately reconstructing single genomes from complex microbial communities. *PeerJ* **3**: e1165.
- van Kessel MAHJ, Speth DR, Albertsen M, Nielsen PH, Op den Camp HJM, Kartal B, *et al.* (2015). Complete nitrification by a single microorganism. *Nature* **528**: 555–559.

- Lücker S, Nowka B, Rattei T, Spieck E, Daims H. (2013). The Genome of *Nitrospina gracilis* Illuminates the Metabolism and Evolution of the Major Marine Nitrite Oxidizer. *Front Microbiol* **4**: 1–19.
- Lücker S, Schwarz J, Gruber-Dorninger C, Spieck E, Wagner M, Daims H. (2015). Nitrotoga-like bacteria are previously unrecognized key nitrite oxidizers in full-scale wastewater treatment plants. *ISME J* **9**: 708–720.
- Lücker S, Wagner M, Maixner F, Pelletier E, Koch H, Vacherie B, *et al.* (2010). A *Nitrospira* metagenome illuminates the physiology and evolution of globally important nitrite-oxidizing bacteria. *Proc Natl Acad Sci U S A* **107**: 13479–13484.
- Magalon A, Fedor JG, Walburger A, Weiner JH. (2011). Molybdenum enzymes in bacteria and their maturation. *Coord Chem Rev* **255**: 1159–1178.
- Miller CS, Baker BJ, Thomas BC, Singer SW, Banfield JF, Pace N, *et al.* (2011). EMIRGE: reconstruction of full-length ribosomal genes from microbial community short read sequencing data. *Genome Biol* **12**: R44.
- Ngugi DK, Blom J, Stepanauskas R, Stingl U. (2015). Diversification and niche adaptations of *Nitrospina*-like bacteria in the polyextreme interfaces of Red Sea brines. *ISME J* **10**: 1383–1399.
- Palatinszky M, Herbold C, Jehmlich N, Pogoda M, Han P, von Bergen M, *et al.* (2015). Cyanate as an energy source for nitrifiers. *Nature* **524**: 105–108.
- Parks DH, Imelfort M, Skennerton CT, Hugenholtz P, Tyson GW. (2015). CheckM: assessing the quality of microbial genomes recovered from isolates, single cells, and metagenomes. *Genome Res* **25**: 1043–55.
- Quast C, Pruesse E, Yilmaz P, Gerken J, Schweer T, Yarza P, *et al.* (2013). The SILVA ribosomal RNA gene database project: Improved data processing and web-based tools. *Nucleic Acids Res* **41**: 590–596.
- Rivera M. (2017). Bacterioferritin: Structure, Dynamics, and Protein-Protein Interactions at Play in Iron Storage and Mobilization. *Acc Chem Res* **50**: 331–340.
- Sit B, Crowley SM, Bhullar K, Lai CCL, Tang C, Hooda Y, *et al.* (2015). Active Transport of Phosphorylated Carbohydrates Promotes Intestinal Colonization and Transmission of a Bacterial Pathogen. *PLoS Pathog* **11**: 1–22.
- Sorokin DY, Lücker S, Vejmolkova D, Kostrikina N a, Kleerebezem R, Rijpstra WIC, *et al.* (2012). Nitrification expanded: discovery, physiology and genomics of a nitrite-oxidizing bacterium from the phylum Chloroflexi. *ISME J* **6**: 2245–2256.
- Starkenburger SR, Larimer FW, Stein LY, Klotz MG, Chain PSG, Sayavedra-Soto LA, *et al.* (2008). Complete genome sequence of *Nitrobacter hamburgensis* X14 and comparative genomic analysis of species within the genus *Nitrobacter*. *Appl Environ Microbiol* **74**: 2852–63.
- Suzek BE, Wang Y, Huang H, McGarvey PB, Wu CH. (2014). UniRef clusters: A comprehensive and scalable alternative for improving sequence similarity searches. *Bioinformatics* **31**: 926–932.
- Tabita FR, Hanson TE, Li H, Satagopan S, Singh J, Chan S. (2007). Function, Structure, and Evolution of the RubisCO-Like Proteins and Their RubisCO Homologs. *Microbiol Mol Biol Rev* **71**: 576–599.
- Tabita FR, Satagopan S, Hanson TE, Kreel NE, Scott SS. (2008). Distinct form I, II, III, and IV Rubisco proteins from the three kingdoms of life provide clues about Rubisco evolution and structure/function relationships. *J Exp Bot* **59**: 1515–1524.
- Ushiki N, Fujitani H, Shimada Y, Morohoshi T. (2018). Genomic Analysis of Two Phylogenetically Distinct *Nitrospira* Species Reveals Their Genomic Plasticity and Functional

Diversity. *Front Microbiol* **8**: 1–12.

Wang Y, Yao H, Cheng Y, Lovell S, Battaile KP, Midaugh CR, *et al.* (2015). Characterization of the Bacterioferritin/Bacterioferritin Associated Ferredoxin Protein-Protein Interaction in Solution and Determination of Binding Energy Hot Spots. *Biochemistry* **54**: 6162–6175.

Wick RR, Schultz MB, Zobel J, Holt KE. (2015). Bandage: Interactive visualization of de novo genome assemblies. *Bioinformatics* **31**: 3350–3352.

Wright ES, Yilmaz LS, Noguera DR. (2012). DECIPHER, a search-based approach to chimera identification for 16S rRNA sequences. *Appl Environ Microbiol* **78**: 717–725.



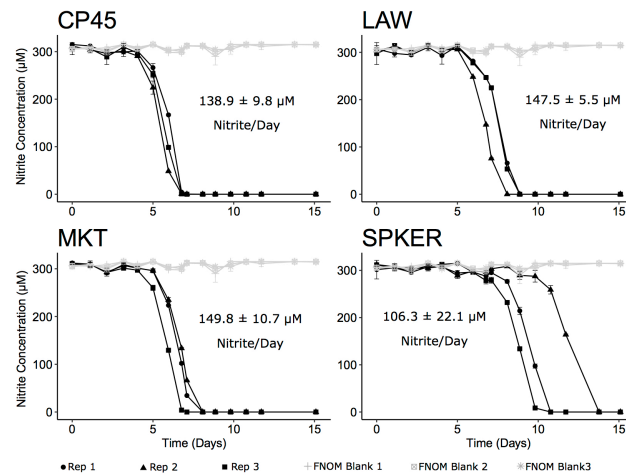

**Figure 1.** Nitrite consumption by *Nitrotoga* enrichment cultures over time.

Each enrichment culture was inoculated in three replicates, and nitrite concentration was quantified colorimetrically in triplicate at each time point. Error bars show the standard deviation of each time point; error bars that appear to be missing are too small to be visualized. Sterile FNOM was used as a control and plotted with each culture. Logarithmic declines in nitrite concentration were used to calculate the nitrite oxidation rate for each biological replicate. The average nitrite consumption per day is shown with standard deviation among triplicate cultures.

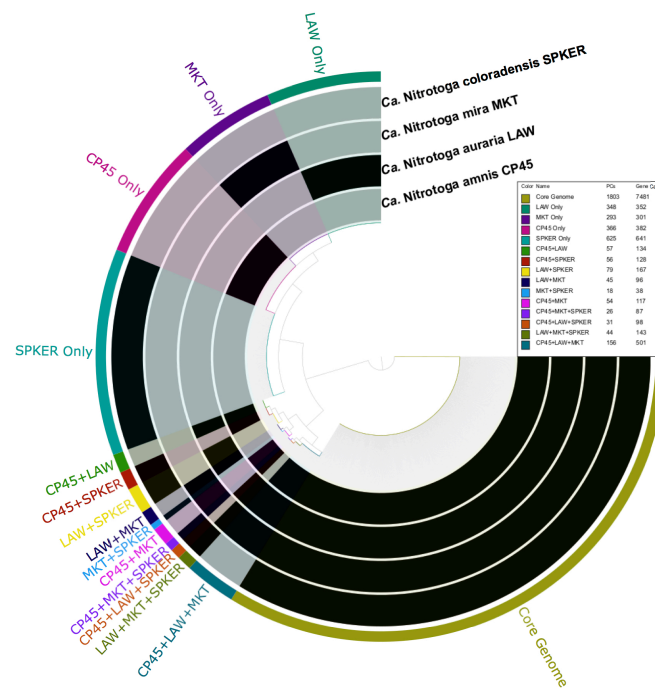

**Figure 2.** Anvi'o pangenome analysis of four *Nitrotoga* genomes. Coding sequences for all four genomes (10,666) in total grouped into 4,001 protein clusters (PCs), based on a pairwise BLAST of all coding sequences from all *Nitrotoga* genomes and clustering using the MCL algorithm (mcl=10). The core genome was represented by 1,803 PCs found in all four *Nitrotoga* genomes. Each individual genome (e.g., MKT only) contained 293-625 unique PCs not found in any other *Nitrotoga* genome.

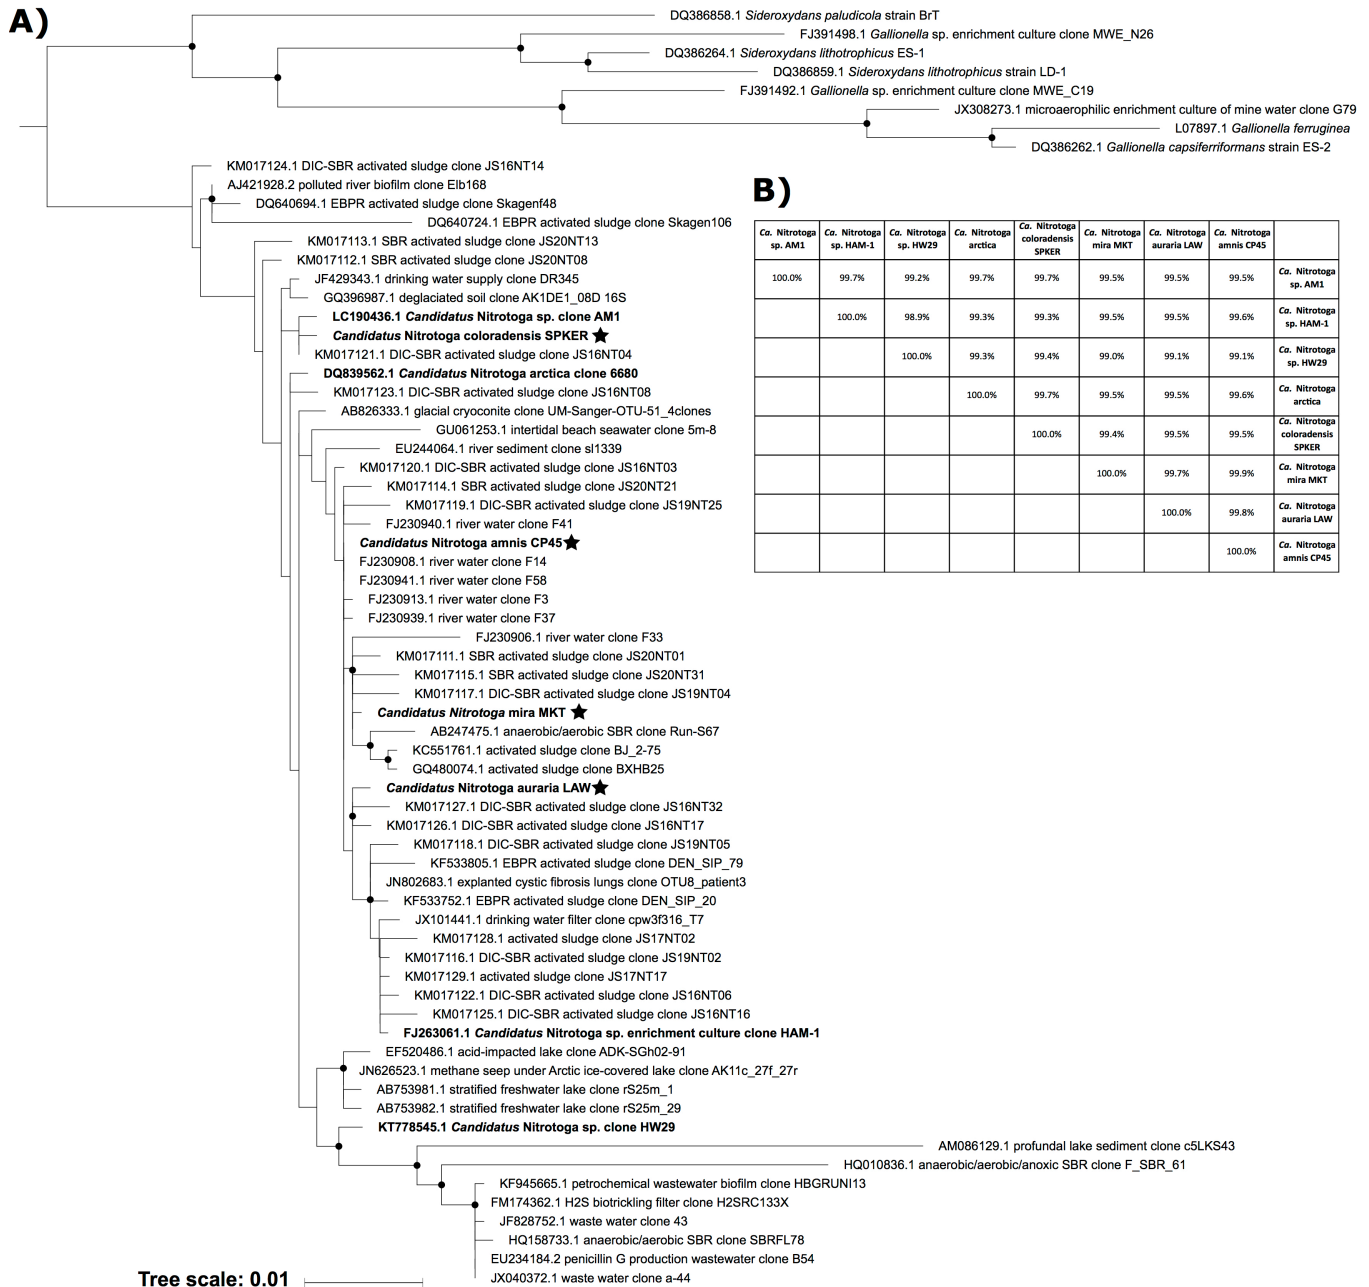

**Figure 3. A)** Maximum likelihood phylogenetic tree of 16S rRNA gene sequences from representative *Ca. Nitrotooga* sequences and close relatives. Sequences were aligned across 1,422 positions; phylogenetic trees were generated using RAxML (version 8.2.9) with 1,000 rapid bootstraps and the GTRGAMMA model of nucleotide substitution. Nodes with bootstrap support values  $\geq 50\%$  are shown with a black circle. A midpoint root was used when selecting outgroup sequences. Bolded sequence names have been enriched in culture. Nodes with a star represent organisms presented in this study. **B)** BLASTN comparisons of near full-length 16S rRNA gene sequences from the eight known enriched *Nitrotooga* sp.

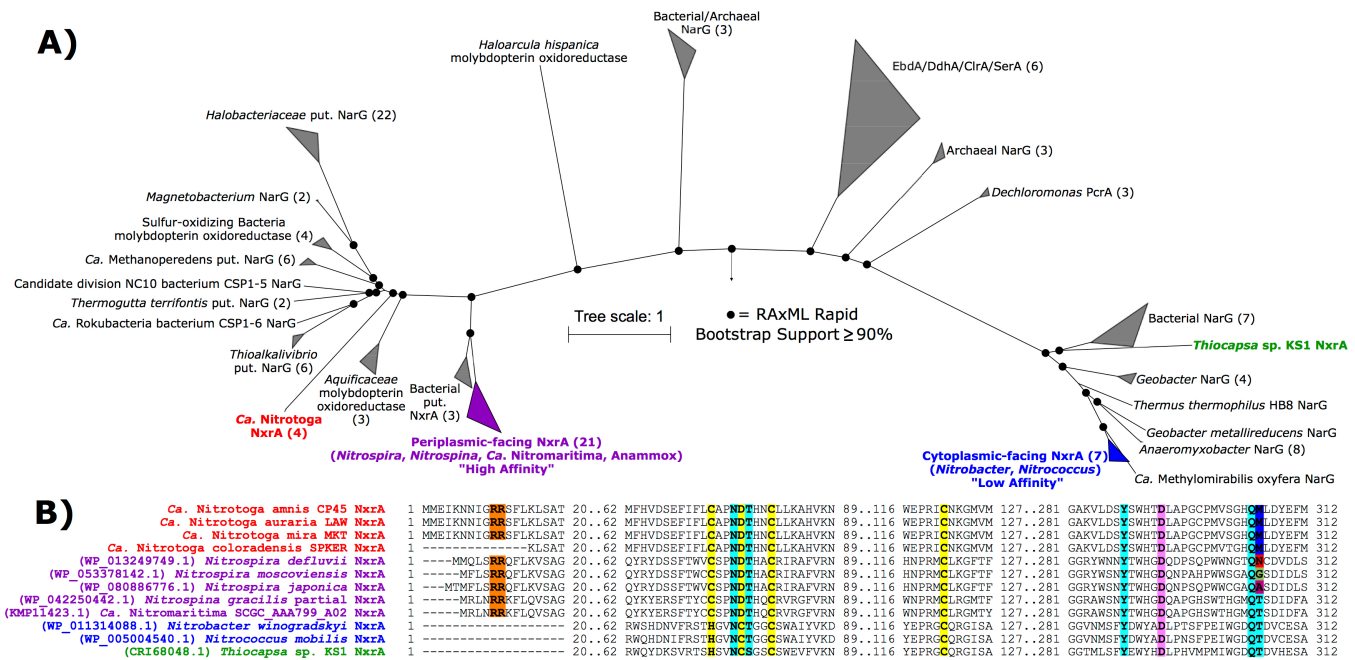

**Figure 4.** Phylogenetic and structural analysis of the alpha subunit of nitrite oxidoreductase (NxrA). **A)** Phylogeny of 122 members of the Type II DMSO reductase protein family aligned and manually trimmed to 1,651 amino acid positions. References were selected to include both cytoplasmic-facing "Low Affinity" and periplasmic-facing "High Affinity" NxrA (Ngugi *et al.*, 2015), as well as other family members: PcrA (perchlorate reductase), EbdA (ethylbenzene dehydrogenase), DdhA (dimethylsulfide dehydrogenase), ClrA (chlorate reductase), SerA (selenite reductase), and NarG (nitrate reductase). Putative enzymes are marked as "put.". The number of sequences in collapsed nodes are shown in parentheses. RAxML rapid bootstrap support values  $\geq 90\%$  are marked with a black circle. **B)** Partial alignment of selected important residues in *Nitrotoga*, periplasmic-facing, and cytoplasmic-facing NxrA (including *Thiocapsa*). Highlights represent Tat signal peptides (Orange), Fe-S cluster binding residues (Yellow), molybdenum coordinating residues (Pink), and nitrite/nitrate binding residues (Light Blue).

**A) Core Genome**

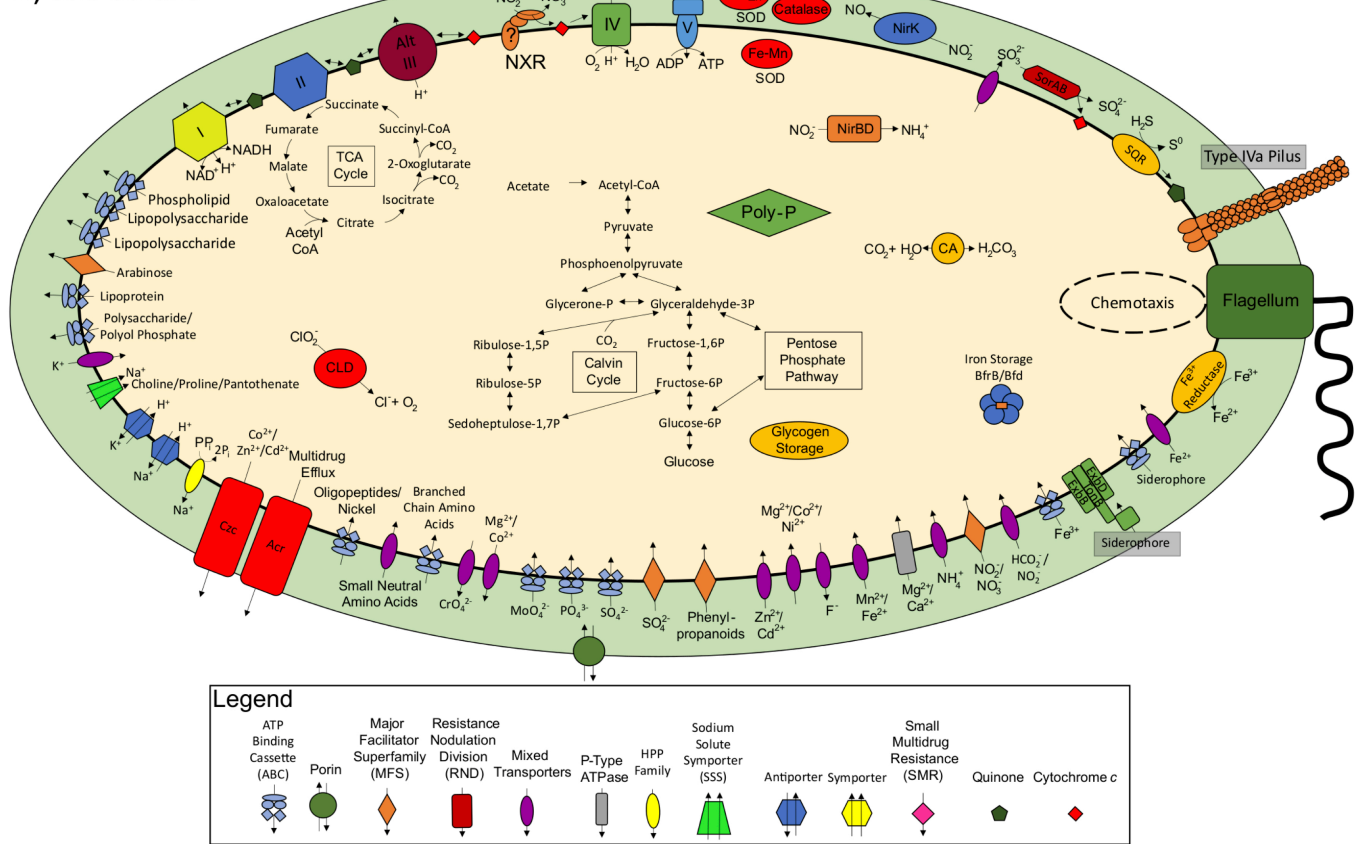

**B) Accessory Genomes**

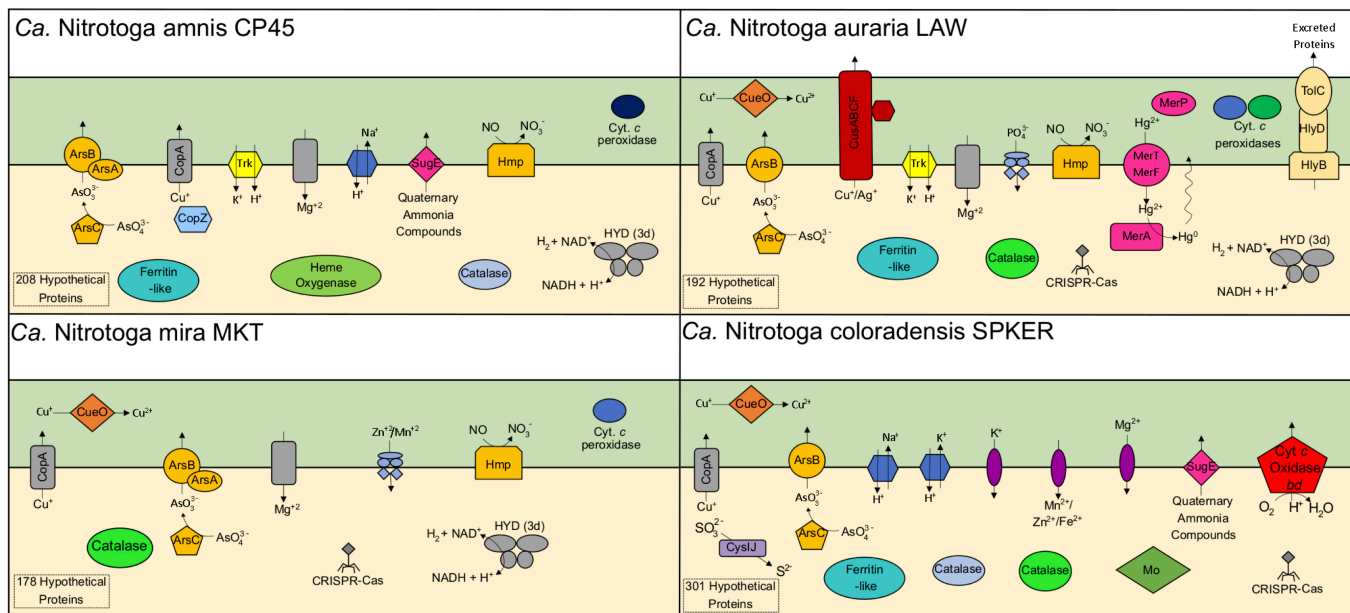

**Figure 5.** Schematic representation of *Nitrotoga* genome features. **A)** The core *Nitrotoga* genome including predicted functions shared by all four genomes. The question mark located in the NxrC subunit symbolizes the uncertainty in whether or not the holoenzyme is anchored to the cell membrane. **B)** Predicted function of individual genomic features found within one or more genomes, but not shared amongst all four. Each genome had 178-301 unique hypothetical proteins, and an additional 171 hypothetical proteins were shared among two or three genomes.



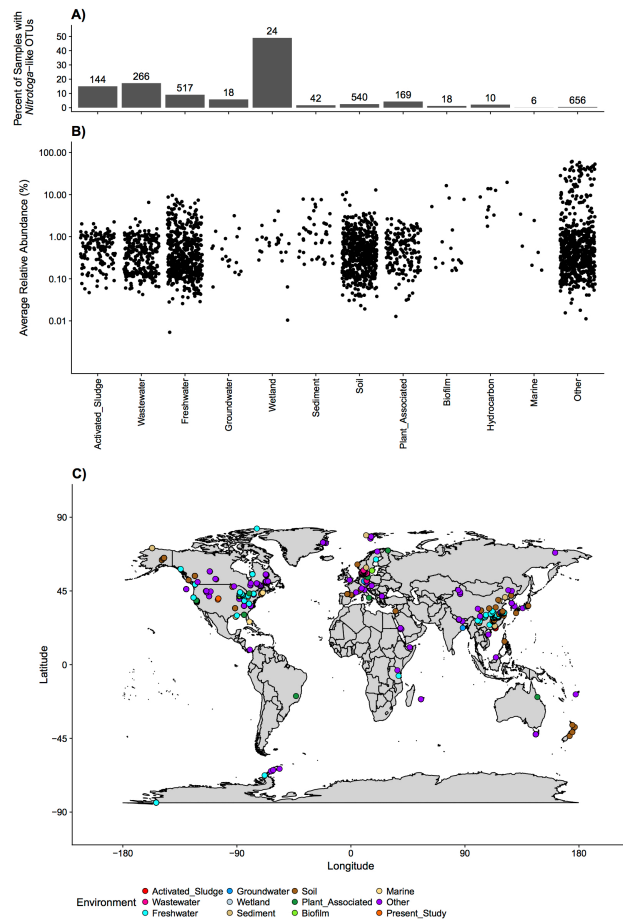

**Figure 6.** Global distribution of *Nitrotoga*-like sequences. OTUs from 16S rRNA gene amplicon studies deposited as SRA runs were clustered by IMNGS. All runs with OTUs  $\geq 97\%$  identity to cultured *Nitrotoga* 16S rRNA gene sequences (from this study), an alignment of at least 200 bp, and at least 100 total reads were kept. **A)** The percent of SRA runs with *Nitrotoga*-like OTUs within respective environments are shown with the number of SRA runs with *Nitrotoga*-like OTUs displayed above each bar. **B)** The relative abundance of *Nitrotoga*-like OTUs was averaged across all four queried *Nitrotoga* 16S rRNA gene sequences and plotted by environment. **C)** Global distribution of SRA runs with *Nitrotoga*-like OTUs. 484 of the 2,410 SRA runs with *Nitrotoga*-like OTUs did not have geographic information available, including all of the "Hydrocarbon" environmental samples. Orange points represent sampling locations for the enrichment cultures presented in this study.

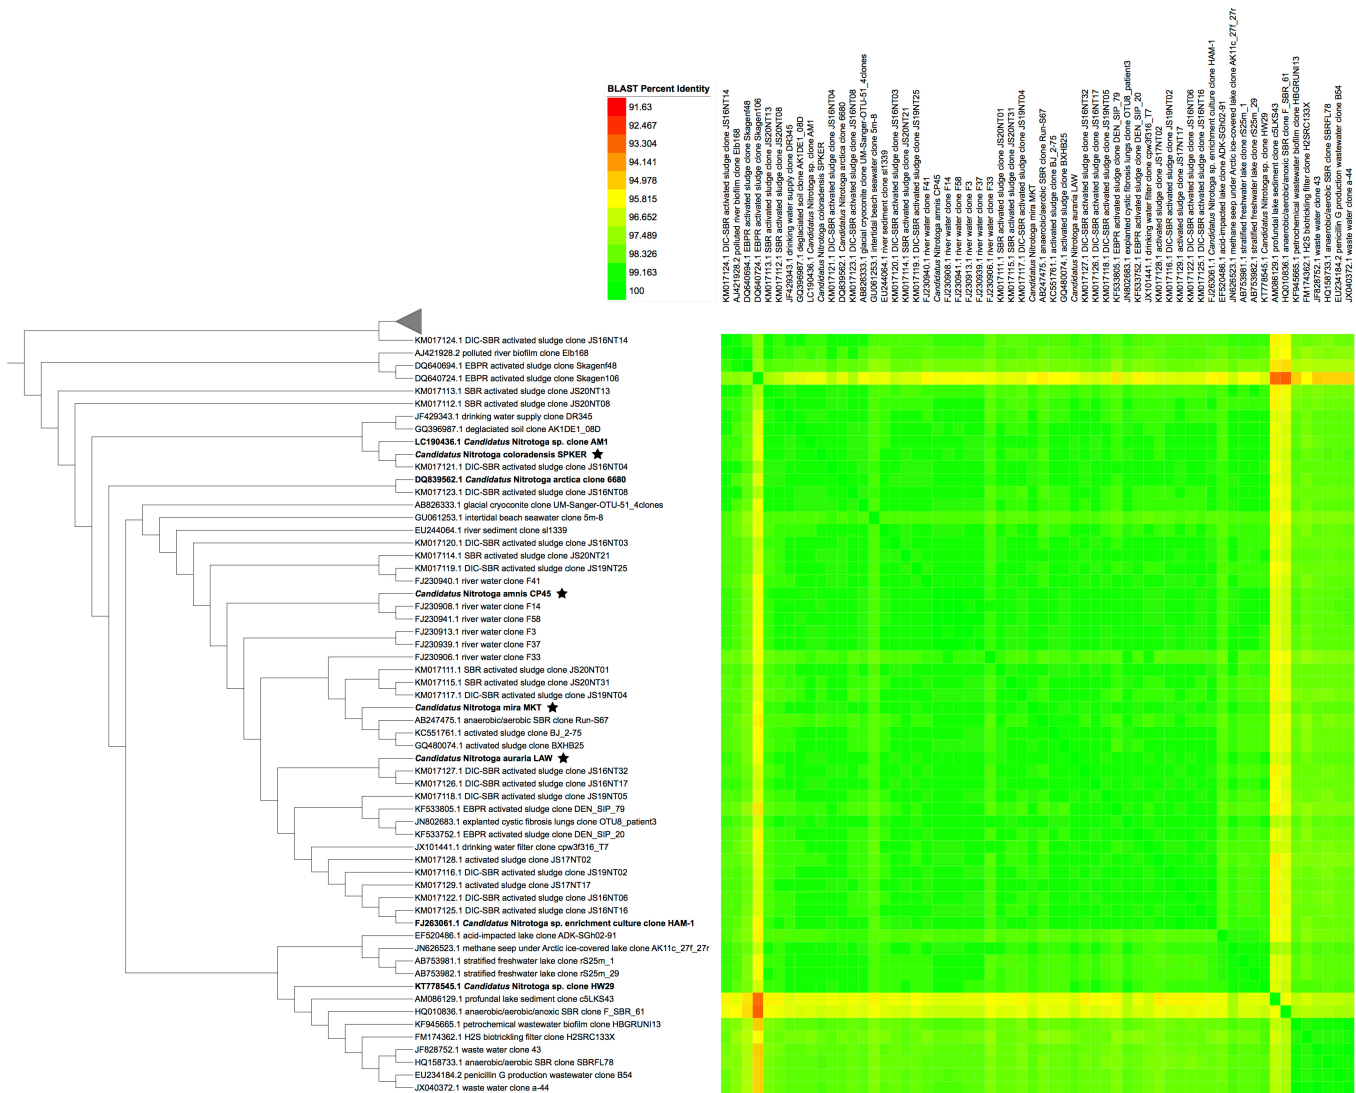

**Supplemental Figure S1.** Pairwise BLAST comparisons of 60 *Nitrotoga* and *Nitrotoga*-like 16S rRNA gene sequences  $\geq 1,300$  bp in length presented as a heatmap. The phylogeny from Figure 3 is displayed on the left with branch lengths ignored. Bolded sequence names have been enriched in culture. Nodes with a star represent organisms presented in this study.

|                                                     |     |                                     |    |   |   |   |   |   |   |   |   |   |   |       |   |       |   |   |    |   |   |   |   |   |   |   |   |   |   |   |   |   |   |   |   |     |   |   |   |   |   |   |     |   |     |     |     |
|-----------------------------------------------------|-----|-------------------------------------|----|---|---|---|---|---|---|---|---|---|---|-------|---|-------|---|---|----|---|---|---|---|---|---|---|---|---|---|---|---|---|---|---|---|-----|---|---|---|---|---|---|-----|---|-----|-----|-----|
| Ca. Nitrotoga amnis CP45 NxrA                       | 1   | MAKVRNWQLGREMDYPYEENRPGRQVSMFLFDLNK | IA | Q | S | C | T | M | A | C | K | T | T | T     | A | G     | K | C | 55 |   |   |   |   |   |   |   |   |   |   |   |   |   |   |   |   |     |   |   |   |   |   |   |     |   |     |     |     |
| Ca. Nitrotoga auraria LAW NxrA                      | 1   | MAKVRNWQLGREMDYPYEENRPGRQITMLFDLNK  | IA | Q | S | C | T | M | A | C | K | T | T | T     | A | G     | K | C | 55 |   |   |   |   |   |   |   |   |   |   |   |   |   |   |   |   |     |   |   |   |   |   |   |     |   |     |     |     |
| Ca. Nitrotoga mira MKT NxrA                         | 1   | MAKVRNWQLGREMDYPYEENRPGRQITMLFDLNK  | IA | Q | S | C | T | M | A | C | K | T | T | T     | A | G     | K | C | 55 |   |   |   |   |   |   |   |   |   |   |   |   |   |   |   |   |     |   |   |   |   |   |   |     |   |     |     |     |
| Ca. Nitrotoga coloradensis SPKER NxrA               | 1   | MAKVRNWQLGREMDYPYEENRPGRQVSMFLFDLNK | IA | Q | S | C | T | M | A | C | K | T | T | T     | A | G     | K | C | 55 |   |   |   |   |   |   |   |   |   |   |   |   |   |   |   |   |     |   |   |   |   |   |   |     |   |     |     |     |
| (WP_013249749.1) Nitrospira defluvii NxrA           | 1   | MPEVYNWQLGRKMLYPYEEERHPKWQFAFVFNINR | CL | A | Q | T | C | S | M | A | D | K | S | T     | W | L     | F | S | 55 |   |   |   |   |   |   |   |   |   |   |   |   |   |   |   |   |     |   |   |   |   |   |   |     |   |     |     |     |
| (WP_053378142.1) Nitrospira moscoviensis NxrA       | 1   | MPEVYNWQLGRKMLYPYEEERHPKWQFAFVFNINR | CL | A | Q | T | C | S | M | A | D | K | S | T     | W | L     | F | S | 55 |   |   |   |   |   |   |   |   |   |   |   |   |   |   |   |   |     |   |   |   |   |   |   |     |   |     |     |     |
| (WP_080886776.1) Nitrospira japonica NxrA           | 1   | MPEVYNWQLGRKMLYPYEEERHPKWQFAFVFNINR | CL | A | Q | T | C | S | M | A | D | K | S | T     | W | L     | F | S | 55 |   |   |   |   |   |   |   |   |   |   |   |   |   |   |   |   |     |   |   |   |   |   |   |     |   |     |     |     |
| (WP_042250442.1) Nitrospina gracilis partial NxrA   | 1   | MPEVYNWQLGRMPTYVYEEKHPKEQFTFVFNINR  | CL | A | Q | T | C | T | M | A | H | K | S | T     | W | T     | F | S | 55 |   |   |   |   |   |   |   |   |   |   |   |   |   |   |   |   |     |   |   |   |   |   |   |     |   |     |     |     |
| (KMP11423.1) Ca. Nitromaritima SCGC AAA799 A02 NxrA | 1   | MPEVYNWQLGRMPTYVYEEKHPKEQFTFVFNINR  | CL | A | Q | T | C | T | M | A | H | K | S | T     | W | T     | F | S | 55 |   |   |   |   |   |   |   |   |   |   |   |   |   |   |   |   |     |   |   |   |   |   |   |     |   |     |     |     |
| (WP_011314088.1) Nitrobacter winogradskyi NxrA      | 1   | -----MDIRAQVSMVFHLDK                | I  | G | H | T | C | S | I | A | C | K | N | I     | W | T     | D | R | 55 |   |   |   |   |   |   |   |   |   |   |   |   |   |   |   |   |     |   |   |   |   |   |   |     |   |     |     |     |
| (WP_005004540.1) Nitrococcus mobilis NxrA           | 1   | -----MDIRAQVSMVFHLDK                | I  | G | H | T | C | S | I | A | C | K | N | I     | W | T     | D | R | 55 |   |   |   |   |   |   |   |   |   |   |   |   |   |   |   |   |     |   |   |   |   |   |   |     |   |     |     |     |
| (CRI68048.1) Thiocapsa sp. KS1 NxrA                 | 1   | -----MRIKQMGIVFNLDK                 | C  | L | G | Q | T | I | A | C | K | N | V | W     | T | N     | R | E | 55 |   |   |   |   |   |   |   |   |   |   |   |   |   |   |   |   |     |   |   |   |   |   |   |     |   |     |     |     |
| Ca. Nitrotoga amnis CP45 NxrA                       | 210 | KNWGGFFPRI                          | C  | N | H | C | T | F | P | G | C | L | A | A     | C | P     | R | K | A  | I | Y | K | R | Q | E | D | G | V | L | I | D | A | S | R | C | R   | G | Y | R | E | C | V | A   | A | C   | P   | 265 |
| Ca. Nitrotoga auraria LAW NxrA                      | 210 | KNWGGFFPRI                          | C  | N | H | C | T | F | P | G | C | L | A | A     | C | P     | R | K | A  | I | Y | K | R | Q | E | D | G | V | L | I | D | A | S | R | C | R   | G | Y | R | E | C | V | A   | A | C   | P   | 265 |
| Ca. Nitrotoga mira MKT NxrA                         | 210 | KNWGGFFPRI                          | C  | N | H | C | T | F | P | G | C | L | A | A     | C | P     | R | K | A  | I | Y | K | R | Q | E | D | G | V | L | I | D | A | S | R | C | R   | G | Y | R | E | C | V | A   | A | C   | P   | 265 |
| Ca. Nitrotoga coloradensis SPKER NxrA               | 210 | KNWGGFFPRI                          | C  | N | H | C | T | F | P | G | C | L | A | A     | C | P     | R | K | A  | I | Y | K | R | Q | E | D | G | V | L | I | D | A | S | R | C | R   | G | Y | R | E | C | V | A   | A | C   | P   | 265 |
| (WP_013249749.1) Nitrospira defluvii NxrA           | 210 | ETYFFYLQRI                          | C  | N | H | C | T | Y | P | G | C | L | A | A     | C | P     | R | K | A  | I | Y | K | R | P | E | D | G | V | L | I | D | Q | N | R | C | R   | G | Y | K | K | C | V | E   | Q | C   | P   | 265 |
| (WP_053378142.1) Nitrospira moscoviensis NxrA       | 210 | ETYFFYLQRI                          | C  | N | H | C | T | Y | P | G | C | L | A | A     | C | P     | R | K | A  | I | Y | K | R | P | E | D | G | V | L | I | D | Q | N | R | C | R   | G | Y | K | K | C | V | E   | Q | C   | P   | 265 |
| (WP_080886776.1) Nitrospira japonica NxrA           | 210 | ETYFFYLQRI                          | C  | N | H | C | T | Y | P | G | C | L | A | A     | C | P     | R | K | A  | I | Y | K | R | P | E | D | G | V | L | I | D | Q | N | R | C | R   | G | Y | K | K | C | V | E   | Q | C   | P   | 265 |
| (WP_042250442.1) Nitrospina gracilis partial NxrA   | 210 | KIWFYLLQRI                          | C  | N | H | C | T | Y | P | G | C | L | A | A     | C | P     | R | K | A  | I | Y | K | R | Q | E | D | G | V | L | I | D | Q | S | R | C | R   | G | Y | K | K | C | V | E   | Q | C   | P   | 265 |
| (KMP11423.1) Ca. Nitromaritima SCGC AAA799 A02 NxrA | 210 | KIWFYLLQRI                          | C  | N | H | C | T | Y | P | G | C | L | A | A     | C | P     | R | K | A  | I | Y | K | R | Q | E | D | G | V | L | I | D | Q | S | R | C | R   | G | Y | K | K | C | V | E   | Q | C   | P   | 265 |
| (WP_011314088.1) Nitrobacter winogradskyi NxrA      | 210 | STVFFYLPR                           | I  | C | N | H | C | L | N | P | G | C | V | A     | A | C     | P | Q | G  | A | L | Y | K | R | G | E | D | G | V | L | S | Q | R | C | R | A   | W | R | M | C | V | S | G   | C | P   | 265 |     |
| (WP_005004540.1) Nitrococcus mobilis NxrA           | 210 | QTVFFYLPR                           | I  | C | N | H | C | L | N | P | G | C | V | A     | A | C     | P | T | G  | A | L | Y | K | R | G | E | D | G | V | L | S | Q | N | R | C | R   | A | W | R | M | C | V | S   | G | C   | P   | 265 |
| (CRI68048.1) Thiocapsa sp. KS1 NxrA                 | 210 | NSEMMYLPRI                          | C  | N | H | C | L | N | P | A | C | V | G | S     | C | P     | S | G | A  | N | Y | K | R | E | E | D | G | V | L | I | D | Q | R | C | R | G   | W | R | C | V | S | G | C   | P | 265 |     |     |
| Ca. Nitrotoga amnis CP45 NxrA                       | 266 | YKKSFYNDTTRTGEK                     | C  | I | S | C | Y | P | K | V | E | A | G | ----- | L | M     | T | Q | C  | V | T | Q | C | I | G | K | I | R | L | F | G | F | K | S | A | 319 |   |   |   |   |   |   |     |   |     |     |     |
| Ca. Nitrotoga auraria LAW NxrA                      | 266 | YKKSFYNDTTRTGEK                     | C  | I | S | C | Y | P | K | V | E | A | G | ----- | L | M     | T | Q | C  | V | T | Q | C | I | G | K | I | R | L | N | G | F | K | S | A | 319 |   |   |   |   |   |   |     |   |     |     |     |
| Ca. Nitrotoga mira MKT NxrA                         | 266 | YKKSFYNDTTRTGEK                     | C  | I | S | C | Y | P | K | V | E | A | G | ----- | L | M     | T | Q | C  | V | T | Q | C | I | G | K | I | R | L | N | G | F | K | S | A | 319 |   |   |   |   |   |   |     |   |     |     |     |
| Ca. Nitrotoga coloradensis SPKER NxrA               | 266 | YKKSFYNDTTRTGEK                     | C  | I | S | C | Y | P | K | V | E | A | G | ----- | L | M     | T | Q | C  | V | T | Q | C | I | G | K | I | R | L | N | G | F | K | S | A | 319 |   |   |   |   |   |   |     |   |     |     |     |
| (WP_013249749.1) Nitrospira defluvii NxrA           | 266 | FKKPMYRGTTTRVSEK                    | C  | I | A | C | Y | P | R | I | E | G | K | D     | P | L     | T | G | G  | E | P | M | E | T | R | C | M | A | A | C | V | G | K | I | R | M   | Q | S | L | M | R | I | 319 |   |     |     |     |
| (WP_053378142.1) Nitrospira moscoviensis NxrA       | 266 | FKKPMYRGTTTRVSEK                    | C  | I | A | C | Y | P | R | I | E | G | K | D     | P | L     | T | G | G  | E | P | M | E | T | R | C | M | A | A | C | V | G | K | I | R | M   | Q | S | L | V | R | I | 319 |   |     |     |     |
| (WP_080886776.1) Nitrospira japonica NxrA           | 266 | FKKPMYRGTTTRVSEK                    | C  | I | A | C | Y | P | R | I | E | G | K | D     | P | L     | T | G | G  | E | P | M | E | T | R | C | M | A | A | C | V | G | K | I | R | M   | Q | S | L | V | R | I | 319 |   |     |     |     |
| (WP_042250442.1) Nitrospina gracilis partial NxrA   | 266 | YKPMFRGTTTRISEK                     | C  | I | A | C | Y | P | R | I | E | G | L | D     | P | L     | T | E | G  | D | Q | M | E | T | R | C | M | A | A | C | V | G | K | I | R | L   | Q | G | L | V | K | I | 319 |   |     |     |     |
| (KMP11423.1) Ca. Nitromaritima SCGC AAA799 A02 NxrA | 266 | YKPMFRGTTTRISEK                     | C  | I | A | C | Y | P | R | I | E | G | L | D     | P | L     | T | E | G  | D | Q | M | E | T | R | C | M | A | A | C | V | G | K | I | R | L   | Q | G | L | V | K | I | 319 |   |     |     |     |
| (WP_011314088.1) Nitrobacter winogradskyi NxrA      | 266 | YKTYFNWSTGKAEK                      | C  | I | L | C | Y | P | R | L | E | S | G | Q     | P | ----- | P | A | C  | F | H | S | C | V | G | R | I | R | Y | I | G | L | V | L | Y | 319 |   |   |   |   |   |   |     |   |     |     |     |
| (WP_005004540.1) Nitrococcus mobilis NxrA           | 266 | YKTYFNWSTGKAEK                      | C  | I | L | C | Y | P | R | L | E | S | G | Q     | P | ----- | P | A | C  | F | H | S | C | V | G | R | I | R | Y | I | G | M | V | L | Y | 319 |   |   |   |   |   |   |     |   |     |     |     |
| (CRI68048.1) Thiocapsa sp. KS1 NxrA                 | 266 | YKTYFNWSTGKSEK                      | C  | I | L | C | F | P | R | L | E | T | G | Q     | P | ----- | P | M | C  | F | Q | A | C | V | G | R | I | R | Y | L | G | P | L | L | Y | 319 |   |   |   |   |   |   |     |   |     |     |     |

**Supplemental Figure S2.** Partial alignment of important residues from selected NxrB subunits representing the *Nitrotoga* (Red), as well as canonical periplasmic-facing (Purple) and cytoplasmic-facing (Blue/Green) NXR. Highlights represent Fe-S cluster binding residues (Yellow).

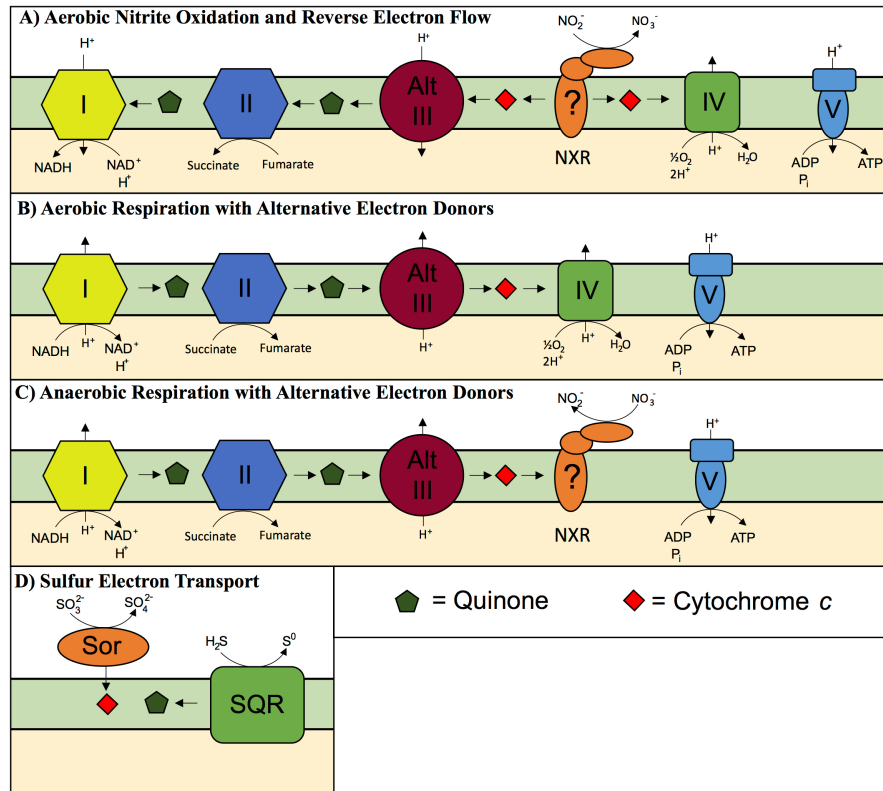

**Supplemental Figure S3.** Schematic of electron transfer in *Nitrotoga* based on genomic evidence. **A)** Canonical nitrite oxidation performed by NXR will liberate two electrons onto cytochrome *c* and flow forwards to the terminal oxidase (Complex IV), or backwards to regenerate NADH via Alternative Complex III and the quinone pool, or to generate biochemical intermediates via Complex II. The question mark located in the NxrC subunit symbolizes the uncertainty in whether or not the holoenzyme is anchored to the cell membrane. **B)** Aerobic respiration with alternative electron donors such as NADH derived from organic carbon utilization. **C)** Hypothesized anaerobic respiration with alternative electron donors (e.g., NADH) with the reduction of nitrate to nitrite via NXR as seen for other NOB. **D)** Electrons derived from reduced sulfur compounds (sulfites or sulfides) are transferred to cytochrome *c* or quinone, which can enter at any point in electron transfer shown in panels B or C.

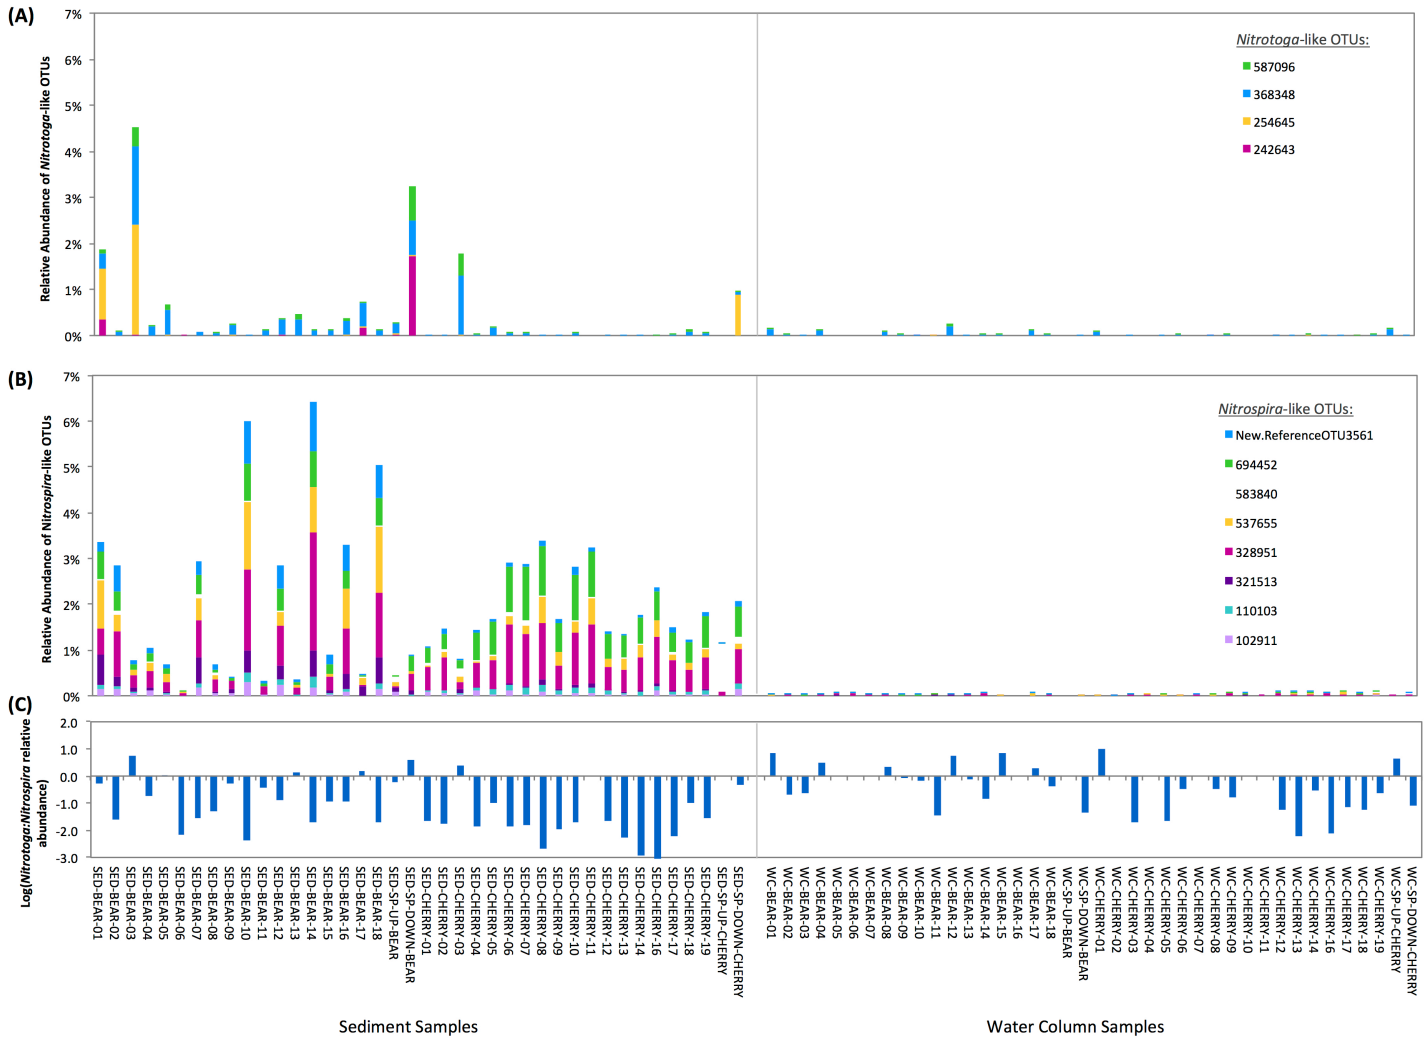

**Supplemental Figure S4.** Relative abundance of **A)** *Nitrotoga*- and **B)** *Nitrospira*-like 16S rRNA gene sequence OTUs from water column ("WC") and sediment ("SED") samples in Bear Creek ("BEAR"), Cherry Creek ("CHERRY"), and the upstream ("SP-UP") and downstream ("SP-DOWN") sites at their respective confluences with the South Platte River. OTUs were based on the amplification with general 16S rRNA gene primers targeting the total bacterial community and were grouped at 97% nucleotide identity. *Nitrotoga* and *Nitrospira* OTUs were identified based on BLAST searches against the SILVA rRNA gene database. **C)** Log ratio of the summed relative abundance of *Nitrotoga*- to *Nitrospira*-like 16S rRNA gene sequences.



#supplemental\_file\_1\_16S\_rRNA\_gene\_accessions

JF429343.1  
GQ396987.1  
KM017113.1  
KM017124.1  
DQ640724.1  
DQ640694.1  
AJ421928.2  
AB826333.1  
EF520486.1  
AB753981.1  
JN626523.1  
AB753982.1  
KT778545.1  
AM086129.1  
HQ010836.1  
HQ158733.1  
KF945665.1  
JF828752.1  
EU234184.2  
JX040372.1  
FM174362.1  
KM017123.1  
KM017112.1  
KM017121.1  
DQ839562.1  
KM017127.1  
KM017126.1  
KF533805.1  
KF533752.1  
JN802683.1  
KM017118.1  
KM017128.1  
KM017125.1  
JX101441.1  
KM017116.1  
FJ263061.1  
KM017122.1  
KM017129.1  
KM017111.1  
FJ230913.1  
FJ230939.1  
KM017115.1  
KM017120.1  
KM017119.1  
FJ230941.1  
FJ230908.1  
FJ230940.1  
FJ230906.1  
KM017114.1

EU244064.1  
KM017117.1  
GU061253.1  
AB247475.1  
KC551761.1  
GQ480074.1  
LC190436.1  
L07897.1  
DQ386262.1  
DQ386264.1  
DQ386858.1  
DQ386859.1  
FJ391492.1  
FJ391498.1  
JX308273.1

#supplemental\_file\_2\_Type\_II\_DMSO\_protein\_accessions

WP\_005557333.1  
KRT71940.1  
WP\_012964344.1  
OHB89378.1  
ARP53735.1  
WP\_006671140.1  
WP\_005553455.1  
WP\_015320288.1  
WP\_090306927.1  
WP\_049927103.1  
WP\_008426537.1  
WP\_008895484.1  
WP\_012942830.1  
WP\_049923369.1  
WP\_013880708.1  
WP\_090615652.1  
WP\_007701576.1  
WP\_006652972.1  
WP\_071400145.1  
WP\_006166072.1  
AGB33389.1  
WP\_006182857.1  
WP\_006649791.1  
WP\_007142113.1  
WP\_089784439.1  
WP\_014030951.1  
WP\_015910069.1  
WP\_006671327.1  
WP\_012459851.1  
Q9S1H0.1  
P60068.1  
WP\_012173623.1  
WP\_028989412.1  
WP\_004513191.1  
KPQ43397.1  
EQB62431.1  
KRT68883.1  
WP\_012470696.1  
WP\_012662440.1  
WP\_005024327.1  
CAF21906.1  
WP\_011509502.1  
WP\_011511827.1  
WP\_041359063.1  
WP\_011314088.1  
WP\_011315305.1  
WP\_004998773.1  
WP\_005004540.1  
CBE67843.1

WP\_012468292.1  
WP\_012132377.1  
WP\_000040373.1  
WP\_012017453.1  
WP\_011365654.1  
WP\_004512301.1  
CAA71210.2  
WP\_010877688.1  
YP\_430751.1  
CRI68048.1  
WP\_011344974.1  
WP\_011879804.1  
WP\_089723899.1  
OQY55899.1  
KCZ70344.1  
WP\_048094100.1  
KMP11423.1  
WP\_048492943.1  
WP\_042250442.1  
WP\_042251421.1  
WP\_015257936.1  
WP\_018861559.1  
WP\_018868538.1  
WP\_018863956.1  
WP\_019624109.1  
WP\_040333786.1  
KJU86102.1  
KHE93157.1  
CAJ72445.1  
WP\_052562588.1  
WP\_096601733.1  
WP\_012513384.1  
WP\_052491869.1  
OQW90655.1  
ACL65121.1  
WP\_012633045.1  
ACG72937.1  
WP\_012525755.1  
GA002124.1  
WP\_059436536.1  
ABC81940.1  
WP\_011421222.1  
WP\_097297472.1  
SNQ62035.1  
WP\_096206654.1  
WP\_062483509.1  
CUS33249.1  
WP\_053378142.1  
WP\_053381280.1  
WP\_053381686.1

WP\_053381689.1  
WP\_053381277.1  
WP\_080886776.1  
CUS31266.1  
WP\_080885591.1  
WP\_013249749.1  
WP\_013249767.1  
CUS38776.1  
WP\_080885705.1  
OHB90204.1  
Q8GPG4.1  
WP\_011223493.1  
AA049008.1  
AFE03185.1  
Q47CW6.1  
WP\_018232354.1  
ASV74111.1  
WP\_095414528.1  
AAK76387.1



**Supplementary Table 1.** Assembly statistics overview for *Nitrotoga* genomes. Percent completeness and contamination were estimated using CheckM. The asterisks indicate manual assignment of some marker genes used in completeness estimates (see Supplemental Note).

|                                         | <b>Num. Contigs</b> | <b>GC %</b> | <b>N50 (bp)</b> | <b>Median Contig Length (bp)</b> | <b>Total Length (bp)</b> | <b>CDS</b> | <b>tRNA</b> | <b>rRNA</b> | <b>% Complete*</b> | <b>% Contamination</b> |
|-----------------------------------------|---------------------|-------------|-----------------|----------------------------------|--------------------------|------------|-------------|-------------|--------------------|------------------------|
| <b>Ca. Nitrotoga amnis CP45</b>         | 59                  | 48.8%       | 69,731          | 35,034                           | 2,816,237                | 2,665      | 36          | 6           | 99.8%              | 0.30%                  |
| <b>Ca. Nitrotoga auraria LAW</b>        | 33                  | 48.7%       | 123,222         | 58,971                           | 2,814,534                | 2,730      | 37          | 6           | 99.8%              | 0.30%                  |
| <b>Ca. Nitrotoga mira MKT</b>           | 23                  | 48.6%       | 214,834         | 70,433                           | 2,707,194                | 2,574      | 39          | 6           | 99.8%              | 0.30%                  |
| <b>Ca. Nitrotoga coloradensis SPKER</b> | 32                  | 47.5%       | 168,712         | 48,253                           | 2,982,257                | 2,858      | 39          | 6           | 99.8%              | 0.24%                  |

**Table 1.** Average nucleotide identity (ANI) between enriched *Nitrotoga* genomes and close relative genomes available on NCBI (unhighlighted cells; top right) and average amino acid identity (AAI) pairwise comparisons (highlighted cells; bottom left).

|                                            | <i>Ca. Nitrotoga amnis</i> CP45 | <i>Ca. Nitrotoga auraria</i> LAW | <i>Ca. Nitrotoga mira</i> MKT | <i>Ca. Nitrotoga coloradensis</i> SPKER | <i>Sideroxydans lithotrophicus</i> ES-1 | <i>Gallionella capsiferriformans</i> ES-2 | <i>Ca. Gallionella acididurans</i> ShG14-8 | <i>Ferriphaselus amnicola</i> | <i>Ferriphaselus</i> sp. R-1 |
|--------------------------------------------|---------------------------------|----------------------------------|-------------------------------|-----------------------------------------|-----------------------------------------|-------------------------------------------|--------------------------------------------|-------------------------------|------------------------------|
| <i>Ca. Nitrotoga amnis</i> CP45            | 100.0%                          | 92.6%                            | 93.3%                         | 86.2%                                   | 76.2%                                   | 76.2%                                     | 75.9%                                      | 74.5%                         | 76.2%                        |
| <i>Ca. Nitrotoga auraria</i> LAW           | 93.8%                           | 100.0%                           | 93.4%                         | 86.2%                                   | 74.2%                                   | 74.3%                                     | 74.8%                                      | 73.8%                         | 74.1%                        |
| <i>Ca. Nitrotoga mira</i> MKT              | 93.9%                           | 94.6%                            | 100.0%                        | 85.9%                                   | 75.6%                                   | 76.5%                                     | 76.9%                                      | 75.7%                         | 76.6%                        |
| <i>Ca. Nitrotoga coloradensis</i> SPKER    | 87.7%                           | 87.9%                            | 87.5%                         | 100.0%                                  | 73.9%                                   | 76.1%                                     | 78.2%                                      | 74.0%                         | 75.0%                        |
| <i>Sideroxydans lithotrophicus</i> ES-1    | 65.8%                           | 66.1%                            | 65.8%                         | 64.5%                                   | 100.0%                                  | 76.4%                                     | 78.0%                                      | 78.4%                         | 78.7%                        |
| <i>Gallionella capsiferriformans</i> ES-2  | 63.2%                           | 64.2%                            | 63.7%                         | 63.3%                                   | 66.1%                                   | 100.0%                                    | 76.7%                                      | 75.9%                         | 78.2%                        |
| <i>Ca. Gallionella acididurans</i> ShG14-8 | 64.6%                           | 64.5%                            | 64.6%                         | 64.2%                                   | 67.1%                                   | 68.3%                                     | 100.0%                                     | 76.5%                         | 77.1%                        |
| <i>Ferriphaselus amnicola</i>              | 65.1%                           | 65.2%                            | 65.1%                         | 64.5%                                   | 67.5%                                   | 66.4%                                     | 65.3%                                      | 100.0%                        | 83.7%                        |
| <i>Ferriphaselus</i> sp. R-1               | 65.0%                           | 65.3%                            | 65.6%                         | 64.6%                                   | 67.9%                                   | 66.0%                                     | 65.5%                                      | 84.7%                         | 100.0%                       |
